# Supplementary material for: Coordination between nucleotide excision repair and specialized polymerase DnaE2 action enables DNA damage survival in non-replicating bacteria
Source: eLife. 2021 Apr 15;10:e67552. doi: 10.7554/eLife.67552 (PMC8102061; doi:10.7554/eLife.67552)
Supplement: Figure 1—figure supplement 1—source data 1. [file elife-67552-fig1-figsupp1-data1.xlsx]

## Sheet: C_Ssb
	Relative position
Time (min)	1	2	3	4	5	6	7	8	9	10	11	12	13	14	15	16	17	18	19	20	21	22	23	24	25
0	0.26087	0.444444	0.241379	0.35	0.304348	0.227273	0.210526	0.304348	0.222222	0.304348	0.3	0.2	0.368421	0.272727	0.294118	0.227273	0.315789	0.4	0.35	0.421053	0.333333	0.277778	0.157895	0.227273	0.333333
10	0.416667	0.421053	0.419355	0.428571	0.4	0.304348	0.25	0.333333	0.315789	0.333333	0.333333	0.3	0.4	0.291667	0.333333	0.173913	0.3	0.380952	0.428571	0.380952	0.421053	0.315789	0.25	0.217391	0.263158
20	0.52	0.526316	0.545455	0.454545	0.333333	0.291667	0.238095	0.36	0.25	0.36	0.363636	0.380952	0.47619	0.384615	0.294118	0.28	0.380952	0.5	0.5	0.380952	0.473684	0.35	0.333333	0.25	0.4
30	0.423077	0.45	0.485714	0.434783	0.346154	0.32	0.333333	0.407407	0.285714	0.346154	0.521739	0.545455	0.5	0.384615	0.263158	0.333333	0.318182	0.434783	0.363636	0.409091	0.45	0.318182	0.318182	0.32	0.380952
40	0.5	0.409091	0.538462	0.44	0.461538	0.333333	0.434783	0.517241	0.363636	0.37037	0.416667	0.521739	0.391304	0.464286	0.368421	0.413793	0.375	0.375	0.478261	0.416667	0.428571	0.409091	0.333333	0.407407	0.409091
50	0.566667	0.434783	0.619048	0.538462	0.555556	0.466667	0.375	0.483871	0.26087	0.413793	0.461538	0.681818	0.48	0.451613	0.47619	0.580645	0.565217	0.36	0.48	0.44	0.272727	0.375	0.52	0.517241	0.434783
60	0.5	0.48		0.5	0.571429	0.5	0.444444	0.454545	0.36	0.5625	0.518519	0.565217	0.5	0.666667	0.409091	0.676471	0.576923	0.444444	0.384615	0.62963	0.478261	0.36	0.592593	0.612903	0.5
70		0.5			0.806452	0.606061	0.37037		0.5				0.5		0.541667	0.794118	0.555556	0.413793	0.678571	0.62963	0.52	0.407407	0.586207	0.6875	0.538462
80		0.642857					0.551724		0.5				0.5					0.580645	0.7	0.645161	0.538462	0.5	0.8

## Sheet: C_HolB
	Relative position
Time (min)	1	2	3	4	5	6	7	8	9	10	11	12	13	14	15	16	17	18	19	20	21	22	23	24	25
0	0.230769	0.259259	0.2	0.380952	0.210526	0.2	0.15	0.2	0.166667	0.35	0.190476	0.173913	0.25	0.25	0.157895	0.217391	0.3	0.36	0.315789	0.181818	0.25	0.26087	0.25	0.157895	0.227273
10	0.407407	0.25	0.238095	0.380952	0.25	0.25	0.238095	0.285714	0.4	0.45	0.2	0.291667	0.333333	0.411765	0.3	0.24	0.2	0.384615	0.368421	0.304348	0.35	0.347826	0.35	0.2	0.217391
20	0.321429	0.37931	0.318182	0.454545	0.25	0.37931	0.142857	0.318182	0.45	0.5	0.285714	0.24	0.318182	0.388889	0.47619	0.296296	0.272727	0.444444	0.35	0.208333	0.272727		0.380952	0.285714	0.217391
30	0.433333	0.433333	0.26087	0.434783	0.380952	0.451613	0.227273	0.478261	0.263158	0.35	0.318182	0.384615	0.347826	0.388889	0.409091	0.384615	0.304348	0.428571	0.380952	0.346154	0.478261	0.44	0.347826	0.304348	0.24
40	0.387097	0.46875	0.333333	0.458333	0.428571	0.666667	0.208333	0.416667	0.238095	0.363636	0.391304	0.333333	0.25	0.4375	0.434783	0.333333	0.4	0.466667	0.454545	0.407407	0.416667	0.346154	0.48	0.25	0.392857
50	0.484848	0.545455	0.346154	0.48	0.347826	0.428571	0.4	0.44	0.47619	0.458333	0.307692	0.428571	0.458333	0.470588	0.68	0.535714	0.461538	0.533333	0.521739	0.392857	0.44	0.407407	0.44	0.32	0.307692
60	0.617647	0.657143	0.444444	0.62963	0.391304	0.594595	0.461538	0.384615	0.380952	0.56	0.36	0.5	0.384615	0.470588	0.68	0.65625	0.535714	0.606061	0.375	0.366667	0.4	0.482759	0.666667	0.518519	0.333333
70		0.75	0.448276	0.75	0.48	0.794872	0.37037	0.678571	0.409091	0.62963	0.535714	0.636364	0.428571	0.5	0.75	0.727273	0.633333		0.423077	0.393939	0.592593		0.724138	0.655172	0.419355
80					0.555556		0.344828		0.333333		0.571429	0.714286	0.6	0.636364	0.793103				0.592593	0.685714	0.586207

## Sheet: C_DnaN
	Relative position
Time (min)	1	2	3	4	5	6	7	8	9	10	11	12	13	14	15	16	17	18	19	20	21	22	23	24	25	26
0	0.428571	0.130435	0.35	0.3	0.157895	0.217391	0.12	0.411765	0.25	0.318182	0.222222	0.136364	0.263158	0.222222	0.0833333	0.222222	0.208333	0.428571	0.272727	0.26087	0.192308	0.217391	0.3	0.2	0.2	0.25
10	0.409091	0.24	0.380952	0.35	0.25	0.25	0.192308	0.368421	0.333333	0.333333	0.35	0.0869565	0.4	0.263158	0.208333	0.210526	0.24	0.380952	0.190476	0.269231	0.296296	0.291667	0.333333	0.25	0.2	0.32
20	0.434783	0.346154	0.363636	0.454545	0.3	0.333333	0.285714	0.5	0.363636	0.416667	0.4	0.28	0.318182	0.263158	0.16	0.277778	0.269231	0.434783	0.333333	0.384615	0.357143	0.333333	0.318182	0.333333	0.318182	0.444444
30	0.458333	0.357143	0.391304	0.375	0.272727	0.37037	0.3	0.380952	0.26087	0.52	0.47619	0.230769	0.434783	0.35	0.423077	0.35	0.407407	0.541667	0.36	0.346154	0.566667	0.444444	0.304348	0.363636	0.391304	0.482759
40	0.48	0.333333	0.48	0.538462	0.26087	0.482759	0.548387	0.454545	0.375	0.555556	0.454545	0.407407	0.458333	0.380952	0.333333	0.333333	0.5	0.6	0.384615	0.333333	0.5625	0.517241	0.32	0.391304	0.36	0.612903
50	0.555556	0.4375	0.518519	0.571429	0.44	0.566667	0.636364	0.458333	0.384615	0.655172	0.434783	0.428571	0.538462	0.454545	0.344828	0.454545	0.566667	0.592593	0.464286	0.25	0.6	0.516129	0.5	0.391304	0.375	0.757576
60		0.647059	0.642857	0.666667	0.423077	0.5625	0.764706	0.52	0.464286	0.645161	0.434783	0.413793	0.576923	0.478261	0.4	0.521739	0.625	0.571429	0.433333	0.321429	0.72973	0.727273		0.44	0.461538	0.771429
70		0.756757			0.428571		0.777778	0.592593	0.6		0.48	0.34375	0.62069	0.48	0.5	0.44		0.566667	0.4375	0.633333				0.76	0.666667
80											0.62963	0.5		0.423077	0.558824	0.44				0.666667				0.689655	0.7

## Sheet: C_DnaE
	Relative position
Time (min)	1	2	3	4	5	6	7	8	9	10	11	12	13	14	15	16	17	18	19	20	21	22	23	24	25
0	0.333333	0.272727	0.285714	0.166667	0.277778	0.227273	0.28	0.210526	0.208333	0.347826	0.157895	0.190476	0.285714	0.210526	0.363636	0.263158	0.318182	0.25	0.3			0.363636	0.26087	0.190476	0.3
10	0.428571	0.391304	0.318182	0.222222		0.347826	0.36	0.4	0.208333	0.375	0.315789	0.272727	0.272727	0.368421	0.375	0.4	0.347826	0.217391	0.227273	0.375	0.347826	0.391304	0.304348	0.227273	0.318182
20	0.454545	0.375	0.347826	0.315789	0.25	0.28	0.444444	0.4	0.28	0.4	0.4	0.217391	0.304348	0.4	0.4	0.35	0.5	0.28	0.347826	0.44	0.416667	0.434783	0.36	0.391304	0.363636
30	0.416667	0.5	0.375	0.315789	0.3	0.28	0.357143	0.380952	0.333333	0.384615	0.35	0.347826	0.347826	0.380952	0.48	0.428571	0.52	0.384615	0.5	0.481481	0.52	0.416667	0.423077	0.375	0.409091
40	0.48	0.464286	0.28	0.25	0.333333	0.384615	0.413793	0.545455	0.416667	0.407407	0.47619	0.36	0.391304	0.409091	0.607143	0.454545	0.518519	0.407407	0.458333	0.535714	0.461538	0.458333	0.444444	0.36	0.416667
50	0.5	0.4	0.407407	0.380952	0.363636	0.321429	0.5	0.363636	0.52	0.517241	0.363636	0.384615	0.32	0.409091	0.689655	0.391304		0.269231	0.4	0.586207	0.461538	0.5	0.517241	0.36	0.48
60	0.555556		0.5	0.409091	0.434783	0.413793	0.411765	0.458333	0.538462	0.580645	0.409091	0.428571	0.541667	0.5	0.709677	0.423077		0.392857	0.444444	0.645161	0.464286	0.518519	0.482759	0.407407	0.52
70	0.392857		0.666667	0.434783	0.416667	0.533333	0.514286	0.5			0.416667	0.517241	0.52	0.416667		0.592593		0.517241	0.481481		0.62069	0.535714	0.466667	0.392857	0.576923
80	0.551724			0.458333	0.44		0.5				0.44	0.533333	0.62963	0.5		0.633333			0.5			0.655172	0.625	0.466667	0.586207
