# Supplementary material for: Coordination between nucleotide excision repair and specialized polymerase DnaE2 action enables DNA damage survival in non-replicating bacteria
Source: eLife. 2021 Apr 15;10:e67552. doi: 10.7554/eLife.67552 (PMC8102061; doi:10.7554/eLife.67552)
Supplement: Figure 2—figure supplement 1—source data 1. [file elife-67552-fig2-figsupp1-data1.xlsx]

## Sheet: A
	Repeat_1								Repeat_2								Repeat_3
	MMC (µg/ml)								MMC (µg/ml)								MMC (µg/ml)
	0	0.125	0.25	0.5	0.75	1	2		0	0.125	0.25	0.5	0.75	1	2		0	0.125	0.25	0.5	0.75	1	2
wild type	1000000	800000	700000	600000	100000	10000	100		700000	700000	500000	300000	100000	10000	100		2000000	2000000	2000000	1700000	100000	10000	100
∆dnaE2	1000000	600000	10000	1000	100	10	0		400000	500000	10000	1000	100	10	0		2000000	1100000	10000	1000	100	10	0
∆recA	700000	10	0	0	0	0	0		500000	10	0	0	0	0	0		1500000	10	0	0	0	0	0
wild type	1	0.8	0.7	0.6	0.1	0.01	0.0001		1	1	0.714286	0.428571	0.142857	0.0142857	0.000142857		1	1	1	0.85	0.05	0.005	5e-05
∆dnaE2	1	0.6	0.01	0.001	0.0001	1e-05	0		1	1.25	0.025	0.0025	0.00025	2.5e-05	0		1	0.55	0.005	0.0005	5e-05	5e-06	0
∆recA	1	1.42857e-05	0	0	0	0	0		1	2e-05	0	0	0	0	0		1	6.66667e-06	0	0	0	0	0
	% survival								% survival								% survival
	MMC (µg/ml)								MMC (µg/ml)								MMC (µg/ml)
	0	0.125	0.25	0.5	0.75	1	2		0	0.125	0.25	0.5	0.75	1	2		0	0.125	0.25	0.5	0.75	1	2
wild type	100	80	70	60	10	1	0.01		100	100	71.4286	42.8571	14.2857	1.42857	0.0142857		100	100	1000	85	5	0.5	0.005
∆dnaE2	100	60	1	0.1	0.01	0.001	0		100	125	2.5	0.25	0.025	0.0025	0		100	55	1	0.05	0.005	0.0005	0
∆recA	100	0.00142857	0	0	0	0	0		100	0.002	0	0	0	0	0		100	0.000666667	0	0	0	0	0

## Sheet: C
Repeat_1												Repeat_2												Repeat_3
DnaN_mCh				Ssb_GFP								DnaN_mCh				Ssb_GFP								DnaN_mCh				Ssb_GFP
Frame	cell ID	spot position		Frame	cell ID	spot position		Distance (pixels)		Distance (µm)		Frame	cell ID	spot position		Frame	cell ID	spot position		Distance (pixels)		Distance (µm)		Frame	cell ID	spot position		Frame	cell ID	spot position		Distance (pixels)		Distance (µm)
1	2	28.9334		1	2	25.9674		-2.96601	2.96601	0.320329		1	1	3.70862		1	1	2.03151		-1.67711	1.67711	0.181128		1	1	23.6088		1	1	22.6465		-0.962305	0.962305	0.103929
1	3	12.0224		1	3	9.8658		-2.15663	2.15663	0.232916		1	2	9.81195		1	2	10.9349		1.12293	1.12293	0.121276		1	2	14.0203		1	2	14.5703		0.549972	0.549972	0.0593969
1	4	24.3611		1	4	24.1455		-0.215637	0.215637	0.0232888		1	2	14.2858						-14.2858	14.2858	1.54286		1	3	12.2149		1	3	9.81518		-2.39974	2.39974	0.259171
1	6	7.63177		1	6	12.6495		5.01772	5.01772	0.541914		1	3	28.056		1	3	27.3013		-0.754698	0.754698	0.0815074		1	4	6.52236		1	4	6.78364		0.261278	0.261278	0.028218
1	7	4.68089		1	7	6.08533		1.40445	1.40445	0.15168		1	4	21.1727		1	4	20.0224		-1.15032	1.15032	0.124235		1	5	24.6149		1	5	23.5994		-1.01548	1.01548	0.109672
1	8	29.2597		1	8	28.851		-0.408741	0.408741	0.044144		1	5	3.24625		1	5	1.63862		-1.60764	1.60764	0.173625		1	6	22.3385		1	6	22.9096		0.571115	0.571115	0.0616805
1	9	16.0182		1	9	15.2547		-0.763423	0.763423	0.0824497		1	6	16.4034		1	6	16.9435		0.5401	0.5401	0.0583308		1	7	18.1663		1	7	18.8054		0.639124	0.639124	0.0690254
1	9	22.7007		1	9	21.5468		-1.15385	1.15385	0.124615		1	7	11.7084		1	7	11.1336		-0.574768	0.574768	0.062075		1	9	32.0784		1	9	9.05588		-23.0226	23.0226	2.48644
1	10	13.0983		1	10	11.8805		-1.21781	1.21781	0.131523		1	8	23.304		1	8	23.1034		-0.200535	0.200535	0.0216578		1	10	4.62141		1	10	5.5718		0.950387	0.950387	0.102642
1	13	31.5123		1	13	30.8967		-0.615545	0.615545	0.0664789		1	9	11.9375		1	9	11.1512		-0.78638	0.78638	0.084929		1	10	15.6274		1	10	21.5872		5.95988	5.95988	0.643667
1	14	23.0191		1	14	23.5443		0.52524	0.52524	0.0567259		1	10	34.7947		1	10	33.5759		-1.2188	1.2188	0.131631		1	11	16.5422		1	11	12.7559		-3.78633	3.78633	0.408924
1	15	8.95916		1	15	7.52285		-1.43631	1.43631	0.155121		1	11	20.1455		1	11	21.2223		1.07676	1.07676	0.11629		1	12	11.2643		1	12	11.8879		0.623592	0.623592	0.067348
1	16	13.1643		1	16	12.7166		-0.447694	0.447694	0.0483509		1	12	10.5952		1	12	9.60249		-0.992689	0.992689	0.10721		1	13	18.9832		1	13	21.3737		2.39049	2.39049	0.258172
1	17	23.4435		1	17	22.6967		-0.746754	0.746754	0.0806494		1	13	7.33291		1	13	6.26655		-1.06636	1.06636	0.115167		1	15	11.2977		1	15	11.9434		0.645747	0.645747	0.0697407
1	18	14.6451		1	18	14.1151		-0.529976	0.529976	0.0572374		1	13	23.2078		1	13	21.648		-1.55972	1.55972	0.16845		1	16	13.7345		1	16	11.5664		-2.16801	2.16801	0.234146
1	19	13.4918		1	19	22.9242		9.43239	9.43239	1.0187		1	14	13.7311		1	14	12.7914		-0.939655	0.939655	0.101483		1	17	20.4012		1	17	20.0997		-0.301487	0.301487	0.0325606
1	20	14.509		1	20	14.2231		-0.285917	0.285917	0.0308791		1	15	21.0337		1	15	20.3794		-0.654295	0.654295	0.0706639		1	18	8.04916		1	18	7.58291		-0.466252	0.466252	0.0503552
1	21	18.7588		1	21	19.1059		0.347075	0.347075	0.037484		1	16	25.7915		1	16	25.7813		-0.0102558	0.0102558	0.00110763		1	18	14.9023		1	18	14.3833		-0.519036	0.519036	0.0560559
1	22	12.4835		1	22	11.4769		-1.00661	1.00661	0.108714		1	17	3.89906		1	17	2.99352		-0.905545	0.905545	0.0977989		1	19	12.0627		1	19	9.91547		-2.14723	2.14723	0.231901
1	23	13.7307		1	23	12.7569		-0.973837	0.973837	0.105174		1	18	11.6393		1	18	10.484		-1.15529	1.15529	0.124771		1	20	20.3231		1	20	21.1201		0.797062	0.797062	0.0860827
1	24	16.0526		1	24	17.2466		1.19398	1.19398	0.12895		1	19	14.5087		1	19	15.0066		0.497898	0.497898	0.053773		1	21	23.2217		1	21	22.4954		-0.726368	0.726368	0.0784477
1	25	18.8		1	25	20.1899		1.38995	1.38995	0.150115		1	20	5.26806		1	20	4.66796		-0.6001	0.6001	0.0648108
1	26	11.8773		1	26	13.2346		1.35734	1.35734	0.146592		1	21	20.2105		1	21	19.9992		-0.211319	0.211319	0.0228224
1	27	9.93141		1	27	10.0497		0.118265	0.118265	0.0127726		1	22	13.8251		1	22	12.7531		-1.07204	1.07204	0.115781
1	28	28.0044		1	28	12.6502		-15.3542	15.3542	1.65825		1	23	30.0378		1	23	33.1514		3.11355	3.11355	0.336263
1	29	20.4951		1	29	17.8762		-2.61884	2.61884	0.282835		1	24	26.0211		1	24	25.6789		-0.342159	0.342159	0.0369532
1	30	18.3566		1	30	18.2061		-0.150476	0.150476	0.0162515		1	25	29.6936		1	25	29.246		-0.44763	0.44763	0.048344
1	31	11.7909		1	31	9.34519		-2.44572	2.44572	0.264138		1	26	22.2698		1	26	19.3312		-2.93857	2.93857	0.317366
1	32	23.3012		1	32	18.7246		-4.57663	4.57663	0.494276		1	27	15.8095		1	27	17.0121		1.20264	1.20264	0.129885
1	33	23.339		1	33	21.3433		-1.99566	1.99566	0.215532		1	28	27.0891		1	28	27.5285		0.439468	0.439468	0.0474626
1	34	18.4086		1	34	17.986		-0.422653	0.422653	0.0456465		1	29	16.2507		1	29	14.8636		-1.38708	1.38708	0.149805
1	35	6.517		1	35	5.99849		-0.51851	0.51851	0.0559991		1	30	14.8157		1	30	14.514		-0.301656	0.301656	0.0325788
1	35	16.2789		1	35	17.5426		1.2637	1.2637	0.13648		1	31	19.0229		1	31	17.7558		-1.26708	1.26708	0.136844
1	36	26.1946		1	36	24.2849		-1.90974	1.90974	0.206252		1	32	14.1987		1	32	10.7396		-3.4591	3.4591	0.373583
1	37	12.7829		1	37	12.4898		-0.293174	0.293174	0.0316628		1	33	22.7099		1	33	24.348		1.63818	1.63818	0.176924
1	38	20.7371		1	38	19.7865		-0.950602	0.950602	0.102665		1	34	8.14937		1	34	14.6869		6.53758	6.53758	0.706058
1	39	30.5205		1	39	32.333		1.81254	1.81254	0.195754		1	35	19.0328		1	35	19.3071		0.274277	0.274277	0.0296219
1	40	20.0477		1	40	21.2523		1.20457	1.20457	0.130094		1	36	13.0034		1	36	35.4626		22.4592	22.4592	2.4256
1	41	15.8476		1	41	16.927		1.07937	1.07937	0.116572		1	37	3.33988		1	37	4.28856		0.948683	0.948683	0.102458
1	42	27.588		1	42	27.99		0.402052	0.402052	0.0434216		1	37	15.8493		1	37	17.1074		1.25806	1.25806	0.135871
1	43	29.3217		1	43	29.7759		0.454262	0.454262	0.0490603		1	38	25.0209		1	38	25.2203		0.199409	0.199409	0.0215362
1	44	11.3666		1	44	11.8974		0.530784	0.530784	0.0573246		1	39	13.2471		1	39	13.3085		0.0614157	0.0614157	0.00663289
1	45	19.1159		1	45	18.7649		-0.350964	0.350964	0.0379041		1	40	24.7598		1	40	14.6072		-10.1526	10.1526	1.09648
1	46	24.8358		1	46	21.0636		-3.77222	3.77222	0.4074		1	41	16.1102		1	41	15.7014		-0.408759	0.408759	0.044146
1	47	29.3885		1	47	29.1321		-0.256371	0.256371	0.027688		1	42	15.1943		1	42	15.328		0.133696	0.133696	0.0144391
1	48	31.7028		1	48	31.3611		-2.57071	2.57071	0.277637		1	43	13.9649		1	43	14.3253		0.360392	0.360392	0.0389223
1	49	10.858		1	49	9.16301		-1.69495	1.69495	0.183055		1	44	5.51004		1	44	19.236		13.726	13.726	1.48241
1	50	24.9293		1	50	23.8316		-1.0977	1.0977	0.118551		1	45	12.0587		1	45	12.9219		0.863194	0.863194	0.0932249
1	51	4.40876		1	51	4.74099		0.332232	0.332232	0.0358811		1	46	10.4527		1	46	9.32142		-1.13125	1.13125	0.122175
1	52	18.1486		1	52	18.4476		0.29896	0.29896	0.0322877		1	70	1.81483		1	70	1.54692		-0.267908	0.267908	0.0289341
1	53	7.06542		1	53	6.06236		-1.00306	1.00306	0.10833		1	71	20.3868		1	71	20.3532		-0.0336208	0.0336208	0.00363105
1	56	10.9308		1	56	11.3957		0.464897	0.464897	0.0502089		1	72	17.8677		1	72	16.6815		-1.18616	1.18616	0.128105
												1	73	19.6659		1	73	20.5513		0.885363	0.885363	0.0956192

## Sheet: D
	Repeat_1									Repeat_2									Repeat_3
	UV (J/m2)									UV (J/m2)									UV (J/m2)
	0	10	25	50	75	100	150	200		0	10	25	50	75	100	150	200		0	10	25	50	75	100	150	200
wild type	2400000	2000000	2400000	900000	340000	70000	4000	30		2600000	1800000	1800000	1000000	400000	100000	3000	50		2000000	2000000	1600000	500000	200000	50000	3000	100
∆dnaE2	2500000	2000000	1600000	800000	150000	10000	400	0		2400000	1600000	1500000	800000	90000	20000	300	0		2000000	1600000	1000000	200000	30000	16000	1000	0
∆recA	1800000	70000	14000	1300	30	0	0	0		2300000	80000	25000	2300	20	0	0	0		1400000	50000	5000	800	10	0	0	0
wild type	1	0.833333	1	0.375	0.141667	0.0291667	0.00166667	1.25e-05		1	0.692308	0.692308	0.384615	0.153846	0.0384615	0.00115385	1.92308e-05		1	1	0.8	0.25	0.1	0.025	0.0015	5e-05
∆dnaE2	1	0.8	0.64	0.32	0.06	0.004	0.00016	0		1	0.666667	0.625	0.333333	0.0375	0.00833333	0.000125	0		1	0.8	0.5	0.1	0.015	0.008	0.0005	0
recA	1	0.0388889	0.00777778	0.000722222	1.66667e-05	0	0	0		1	0.0347826	0.0108696	0.001	8.69565e-06	0	0	0		1	0.0357143	0.00357143	0.000571429	7.14286e-06	0	0	0
	% survival									% survival									% survival
	UV (J/m2)									UV (J/m2)									UV (J/m2)
	0	10	25	50	75	100	150	200		0	10	25	50	75	100	150	200		0	10	25	50	75	100	150	200
wild type	100	83.3333	100	37.5	14.1667	2.91667	0.166667	0.00125		100	69.2308	69.2308	38.4615	15.3846	3.84615	0.115385	0.00192308		100	100	80	25	10	2.5	0.15	0.005
∆dnaE2	100	80	64	32	6	0.4	0.016	0		100	66.6667	62.5	33.3333	3.75	0.833333	0.0125	0		100	80	50	10	1.5	0.8	0.05	0
∆recA	100	3.88889	0.777778	0.0722222	0.00166667	0	0	0		100	3.47826	1.08696	0.1	0.000869565	0	0	0		100	3.57143	0.357143	0.0571429	0.000714286	0	0	0

## Sheet: F
			Repeat_1									Repeat_2									Repeat_3								Total cells analyzed
			cells				% cells					cells				% cells					cells				% cells
	UV (J/m2)	time (min)	0	1	≥2	total	0	1	≥2	total		0	1	≥2	total	0	1	≥2	total		0	1	≥2	total	0	1	≥2	total
DnaN	75	0	107	54	7	168	63.6905	32.1429	4.16667	100		62	35	17	114	54.386	30.7018	14.9123	100		63	37	14	114	55.2632	32.4561	12.2807	100	396
		90	96	7	0	103	93.2039	6.79612	0	100		111	9	1	121	91.7355	7.43802	0.826446	100		97	11	0	108	89.8148	10.1852	0	100	332
	150	0	7	52	46	105	6.66667	49.5238	43.8095	100		13	63	36	112	11.6071	56.25	32.1429	100		11	65	29	105	10.4762	61.9048	27.619	100	322
		90	89	37	6	132	67.4242	28.0303	4.54545	100		75	33	2	110	68.1818	30	1.81818	100		74	36	9	119	62.1849	30.2521	7.56303	100	361
			% cells
	UV (J/m2)	time (min)	0			1			≥2
DnaN	75	0	63.6905	54.386	55.2632	32.1429	30.7018	32.4561	4.16667	14.9123	12.2807
		90	93.2039	91.7355	89.8148	6.79612	7.43802	10.1852	0	0.826446	0
	150	0	6.66667	11.6071	10.4762	49.5238	56.25	61.9048	43.8095	32.1429	27.619
		90	67.4242	68.1818	62.1849	28.0303	30	30.2521	4.54545	1.81818	7.56303

## Sheet: G
			Repeat_1									Repeat_2									Repeat_3								Total cells analyzed
			cells				% cells					cells				% cells					cells				% cells
UV (J/m2)		time (min)	0	1	≥2	total	0	1	≥2	total		0	1	≥2	total	0	1	≥2	total		0	1	≥2	total	0	1	≥2	total
75	Ssb	0	52	52	15	119	43.6975	43.6975	12.605	100		55	47	16	118	46.6102	39.8305	13.5593	100		46	40	17	103	44.6602	38.835	16.5049	100	340
		90	91	13	2	106	85.8491	12.2642	1.88679	100		93	18	3	114	81.5789	15.7895	2.63158	100		97	18	2	117	82.906	15.3846	1.7094	100	337
	HolB	0	59	41	12	112	52.6786	36.6071	10.7143	100		62	30	16	108	57.4074	27.7778	14.8148	100		62	39	13	114	54.386	34.2105	11.4035	100	334
		90	93	16	4	113	82.3009	14.1593	3.53982	100		96	15	1	112	85.7143	13.3929	0.892857	100		109	8	2	119	91.5966	6.72269	1.68067	100	344
	DnaE	0	71	38	6	115	61.7391	33.0435	5.21739	100		71	37	4	112	63.3929	33.0357	3.57143	100		77	38	7	122	63.1148	31.1475	5.7377	100	349
		90	103	7	2	112	91.9643	6.25	1.78571	100		110	10	1	121	90.9091	8.26446	0.826446	100		112	10	1	123	91.0569	8.13008	0.813008	100	356
			% cells
UV (J/m2)		time (min)	0			1			≥2
75	Ssb	0	43.6975	46.6102	44.6602	43.6975	39.8305	38.835	12.605	13.5593	16.5049
		90	85.8491	81.5789	82.906	12.2642	15.7895	15.3846	1.88679	2.63158	1.7094
	HolB	0	52.6786	57.4074	54.386	36.6071	27.7778	34.2105	10.7143	14.8148	11.4035
		90	82.3009	85.7143	91.5966	14.1593	13.3929	6.72269	3.53982	0.892857	1.68067
	DnaE	0	61.7391	63.3929	63.1148	33.0435	33.0357	31.1475	5.21739	3.57143	5.7377
		90	91.9643	90.9091	91.0569	6.25	8.26446	8.13008	1.78571	0.826446	0.813008
