# Supplementary material for: Coordination between nucleotide excision repair and specialized polymerase DnaE2 action enables DNA damage survival in non-replicating bacteria
Source: eLife. 2021 Apr 15;10:e67552. doi: 10.7554/eLife.67552 (PMC8102061; doi:10.7554/eLife.67552)
Supplement: Figure 2—source data 1. [file elife-67552-fig2-data1.xlsx]

## Sheet: B
		Repeat_1									Repeat_2									Repeat_3								Total cells analyzed
MMC 0.5 µg/ml		cells				% cells					cells				% cells					cells				% cells
		0	1	≥2	total	0	1	≥2	total		0	1	≥2	total	0	1	≥2			0	1	≥2	total	0	1	≥2
Ssb	MMC (-)	104	2	1	107	97.1963	1.86916	0.934579	100		113	1	0	114	99.1228	0.877193	0	100		109	3	0	112	97.3214	2.67857	0	100	333
	MMC (+)	27	56	33	116	23.2759	48.2759	28.4483	100		22	44	43	109	20.1835	40.367	39.4495	100		16	41	43	100	16	41	43	100	325
HolB	MMC (-)	109	2	1	112	97.3214	1.78571	0.892857	100		111	2	1	114	97.3684	1.75439	0.877193	100		106	3	0	109	97.2477	2.75229	0	100	335
	MMC (+)	48	46	25	119	40.3361	38.6555	21.0084	100		49	44	14	107	45.7944	41.1215	13.0841	100		49	55	9	113	43.3628	48.6726	7.9646	100	339
DnaN	MMC (-)	103	2	0	105	98.0952	1.90476	0	100		105	1	1	107	98.1308	0.934579	0.934579	100		110	1	1	112	98.2143	0.892857	0.892857	100	324
	MMC (+)	54	39	11	104	51.9231	37.5	10.5769	100		93	82	32	207	44.9275	39.6135	15.4589	100		76	64	25	165	46.0606	38.7879	15.1515	100	476
DnaE	MMC (-)	105	1	0	106	99.0566	0.943396	0	100		124	3	0	127	97.6378	2.3622	0	100		125	3	0	128	97.6562	2.34375	0	100	361
	MMC (+)	66	38	19	123	53.6585	30.8943	15.4472	100		59	37	8	104	56.7308	35.5769	7.69231	100		55	44	5	104	52.8846	42.3077	4.80769	100	331
		% cells with foci
Ssb	MMC (-)	2.80374	0.877193	2.67857
	MMC (+)	76.7241	79.8165	84
HolB	MMC (-)	2.67857	2.63158	2.75229
	MMC (+)	59.6639	54.2056	56.6372
DnaN	MMC (-)	1.90476	1.86916	1.78571
	MMC (+)	48.0769	55.0725	53.9394
DnaE	MMC (-)	0.943396	2.3622	2.34375
	MMC (+)	46.3415	43.2692	47.1154

## Sheet: C
		Repeat_1									Repeat_2									Repeat_3								Total cells analyzed
MMC 0.5 µg/ml		cells_DnaN foci				% cells_DnaN foci					cells_DnaN foci				% cells_DnaN foci					cells_DnaN foci				% cells_DnaN foci
	time (min)	0	1	≥2	total	0	1	≥2	total		0	1	≥2	total	0	1	≥2	total		0	1	≥2	total	0	1	≥2	total
wild type	0	54	39	11	104	51.9231	37.5	10.5769	100		93	82	32	207	44.9275	39.6135	15.4589	100		76	64	25	165	46.0606	38.7879	15.1515	100	476
	30	68	32	6	106	64.1509	30.1887	5.66038	100		106	94	34	234	45.2991	40.1709	14.5299	100		83	49	24	156	53.2051	31.4103	15.3846	100	496
	60	83	20	4	107	77.5701	18.6916	3.73832	100		130	64	24	218	59.633	29.3578	11.0092	100		98	47	20	165	59.3939	28.4848	12.1212	100	490
	90	80	21	1	102	78.4314	20.5882	0.980392	100		140	58	16	214	65.4206	27.1028	7.47664	100		108	41	11	160	67.5	25.625	6.875	100	476
		% cells_DnaN foci
		0			1			≥2
wild type	0	51.9231	44.9275	46.0606	37.5	39.6135	38.7879	10.5769	15.4589	15.1515
	30	64.1509	45.2991	53.2051	30.1887	40.1709	31.4103	5.66038	14.5299	15.3846
	60	77.5701	59.633	59.3939	18.6916	29.3578	28.4848	3.73832	11.0092	12.1212
	90	78.4314	65.4206	67.5	20.5882	27.1028	25.625	0.980392	7.47664	6.875

## Sheet: D
		Repeat_1									Repeat_2									Repeat_3								Total cells analyzed
MMC 0.5 µg/ml		cells				% cells					cells				% cells					cells				% cells
	time (min)	0	1	≥2	total	0	1	≥2			0	1	≥2	total	0	1	≥2			0	1	≥2	total	0	1	≥2
Ssb	0	27	56	33	116	23.2759	48.2759	28.4483	100		22	44	43	109	20.1835	40.367	39.4495	100		16	41	43	100	16	41	43	100	325
	90	61	51	21	133	45.8647	38.3459	15.7895	100		40	40	23	103	38.835	38.835	22.3301	100		102	99	52	253	40.3162	39.1304	20.5534	100	489
HolB	0	48	46	25	119	40.3361	38.6555	21.0084	100		49	44	14	107	45.7944	41.1215	13.0841	100		49	55	9	113	43.3628	48.6726	7.9646	100	339
	90	68	29	17	114	59.6491	25.4386	14.9123	100		74	25	2	101	73.2673	24.7525	1.9802	100		67	26	16	109	61.4679	23.8532	14.6789	100	324
DnaE	0	66	38	19	123	53.6585	30.8943	15.4472	100		59	37	8	104	56.7308	35.5769	7.69231	100		55	44	5	104	52.8846	42.3077	4.80769	100	331
	90	113	40	7	160	70.625	25	4.375	100		69	32	6	107	64.486	29.9065	5.60748	100		64	29	1	94	68.0851	30.8511	1.06383	100	361
		% cells with foci
Ssb	0	76.7241	79.8165	84
	90	54.1353	61.165	59.6838
HolB	0	59.6639	54.2056	56.6372
	90	40.3509	26.7327	38.5321
DnaE	0	46.3415	43.2692	47.1154
	90	29.375	35.514	31.9149
