# Supplementary material for: Coordination between nucleotide excision repair and specialized polymerase DnaE2 action enables DNA damage survival in non-replicating bacteria
Source: eLife. 2021 Apr 15;10:e67552. doi: 10.7554/eLife.67552 (PMC8102061; doi:10.7554/eLife.67552)
Supplement: Figure 3—figure supplement 1—source data 1. [file elife-67552-fig3-figsupp1-data1.xlsx]

## Sheet: B
		Repeat_1									Repeat_2									Repeat_3								Total cells analyzed
MMC 0.5 µg/ml		cells				% cells_Ssb foci					cells				% cells_Ssb foci					cells				% cells_Ssb foci
		0	1	≥2	total	0	1	≥2	total		0	1	≥2	total	0	1	≥2	total		0	1	≥2	total	0	1	≥2	total
wild type	MMC (-)	27	56	33	116	23.2759	48.2759	28.4483	100		22	44	43	109	20.1835	40.367	39.4495	100		16	41	43	100	16	41	43	100	325
	MMC (+)	61	51	21	133	45.8647	38.3459	15.7895	100		40	40	23	103	38.835	38.835	22.3301	100		102	99	52	253	40.3162	39.1304	20.5534	100	489
∆uvrA	MMC (-)	160	1	2	163	98.1595	0.613497	1.22699	100		170	2	1	173	98.2659	1.15607	0.578035	100		168	1	1	170	98.8235	0.588235	0.588235	100	506
	MMC (+)	164	3	0	167	98.2036	1.79641	0	100		168	3	0	171	98.2456	1.75439	0	100		168	7	0	175	96	4	0	100	513
		% cells with Ssb foci
wild type	MMC (-)	76.7241	79.8165	84
	MMC (+)	54.1353	61.165	59.6838
∆uvrA	MMC (-)	1.84049	1.7341	1.17647
	MMC (+)	1.79641	1.75439	4

## Sheet: C
		Repeat_1									Repeat_2									Repeat_3								Total cells analyzed
UV 75 J/m2		cells				% cells_foci					cells				% cells_foci					cells				% cells_foci
		0	1	≥2	total	0	1	≥2	total		0	1	≥2	total	0	1	≥2	total		0	1	≥2	total	0	1	≥2	total
Ssb	wild type	52	52	15	119	43.6975	43.6975	12.605	100		55	47	16	118	46.6102	39.8305	13.5593	100		46	40	17	103	44.6602	38.835	16.5049	100	340
	∆uvrA	111	5	0	116	95.6897	4.31034	0	100		110	5	0	115	95.6522	4.34783	0	100		107	7		114	93.8596	6.14035	0	100	345
DnaN	wild type	107	54	7	168	63.6905	32.1429	4.16667	100		62	35	17	114	54.386	30.7018	14.9123	100		63	37	14	114	55.2632	32.4561	12.2807	100	396
	∆uvrA	112	1	0	113	99.115	0.884956	0	100		111	4	0	115	96.5217	3.47826	0	100		119	2		121	98.3471	1.65289	0	100	349
		% cells with foci
Ssb	wild type	56.3025	53.3898	55.3398
	∆uvrA	4.31034	4.34783	6.14035
DnaN	wild type	36.3095	45.614	44.7368
	∆uvrA	0.884956	3.47826	1.65289

## Sheet: D
		Repeat_1									Repeat_2									Repeat_3								Total cells analyzed
MMC 0.5 µg/ml		cells				% cells_DnaN foci					cells				% cells_DnaN foci					cells				% cells_DnaN foci
		0	1	≥2	total	0	1	≥2	total		0	1	≥2	total	0	1	≥2	total		0	1	≥2	total	0	1	≥2	total
wild type	MMC (-)	103	2	0	105	98.0952	1.90476	0	100		105	1	1	107	98.1308	0.934579	0.934579	100		110	1	1	112	98.2143	0.892857	0.892857	100	324
	MMC (+)	54	39	11	104	51.9231	37.5	10.5769	100		93	82	32	207	44.9275	39.6135	15.4589	100		76	64	25	165	46.0606	38.7879	15.1515	100	476
∆mutL	MMC (-)	112	1	0	113	99.115	0.884956	0	100		104	2	0	106	98.1132	1.88679	0	100		130	0	0	130	100	0	0	100	349
	MMC (+)	78	53	33	164	47.561	32.3171	20.122	100		60	36	22	118	50.8475	30.5085	18.6441	100		53	39	8	100	53	39	8	100	382
		% cells with foci
wild type	MMC (-)	1.90476	1.86916	1.78571
	MMC (+)	48.0769	55.0725	53.9394
∆mutL	MMC (-)	0.884956	1.88679	0
	MMC (+)	52.439	49.1525	47
