# Supplementary material for: Coordination between nucleotide excision repair and specialized polymerase DnaE2 action enables DNA damage survival in non-replicating bacteria
Source: eLife. 2021 Apr 15;10:e67552. doi: 10.7554/eLife.67552 (PMC8102061; doi:10.7554/eLife.67552)
Supplement: Figure 3—source data 1. [file elife-67552-fig3-data1.xlsx]

## Sheet: A
	total flourescence intensity/cell length (a. u)
	0 min	90 min	0 min	90 min
	0.00361	0.000844	0.0176	0.070111
	0.002647	0.000562	0.017173	0.07493
	0.00104	0.000972	0.022363	0.089328
	0.000968	0.002014	0.026825	0.078883
	0.000678	0.000821	0.022425	0.102199
	0.000719	0.000754	0.020937	0.101409
	0.012308	0.002131	0.01261	0.038407
	0.005295	0.008763	0.020302	0.069842
	0.006598	0.001595	0.026316	0.095007
	0.009794	0.001616	0.029873	0.081568
	0.003891	0.000858	0.023592	0.076935
	0.00361	0.001106	0.01555	0.097978
	0.001281	0.00226	0.03376	0.060395
	0.001737	0.004087	0.021784	0.047102
	0.003348	0.003011	0.04003	0.069263
	0.001303	0.004385	0.026156	0.092673
	0.002495	0.008364	0.03255	0.070038
	0.011136	0.001414	0.039905	0.095295
	0.016408	0.006869	0.013759	0.058779
	0.000837	0.001152	0.011242	0.074966
	0.001728	0.001198	0.013869	0.091322
	0.004352	0.004296	0.031006	0.059496
	0.000561	0.006195	0.037998	0.104114
	0.00072	0.001346	0.017416	0.101151
	0.008637	0.004305	0.019526	0.085236
	0.001831	0.001329	0.035362	0.076999
	0.001855	0.002205	0.024988	0.091471
	0.00103	0.002427	0.028511	0.063725
	0.001246	0.003285	0.009335	0.080153
	0.001729	0.000915	0.024555	0.071757
	0.003538	0.002237	0.017782	0.062084
	0.001698	0.006775	0.012723	0.078921
	0.000715	0.002928	0.039105	0.079931
	0.000861	0.00102	0.031455	0.091353
	0.005962	0.001095	0.018834	0.066226
	0.002474	0.001397	0.022766	0.058611
	0.001784	0.002235	0.01408	0.060001
	0.007065	0.001094	0.02829	0.064262
	0.001567	0.001176	0.009627	0.096506
	0.013241	0.001849	0.024618	0.093786
	0.001108	0.004848	0.030227	0.06104
	0.01749	0.001581	0.034899	0.072063
	0.001294	0.002592	0.020108	0.098857
	0.005676	0.011599	0.017152	0.069365
	0.000793	0.001903	0.027883	0.101106
	0.000868	0.002556	0.03071	0.04322
	0.000671	0.001394	0.014882	0.053096
	0.001009	0.002379	0.027136	0.066298
	0.001312	0.003007	0.033806	0.088056
	0.00365	0.001487	0.03002	0.048395
	0.001284	0.001955	0.021953	0.084066
	0.006361	0.004072	0.011476	0.080058
	0.002366	0.001007	0.022534	0.070216
	0.003444	0.001247	0.022758	0.089205
	0.002954	0.001752	0.01162	0.065605
	0.000941	0.001763	0.037743	0.080315
	0.003455	0.000896	0.022628	0.062004
	0.007258	0.001665	0.018021	0.070655
	0.002331	0.001074	0.025977	0.088685
	0.004504	0.001554	0.021412	0.070467
	0.009111	0.001535	0.012882	0.067286
	0.001295	0.002948	0.035105	0.011119
	0.006526	0.006187	0.018722	0.077082
	0.003582	0.002752	0.027964	0.057694
	0.007507	0.00071	0.026242	0.056188
	0.012747	0.000613	0.020461	0.077163
	0.00268	0.001279	0.022258	0.075964
	0.001097	0.002102	0.023646	0.068652
	0.006299	0.001851	0.018418	0.086858
	0.001688	0.002331	0.01024	0.053098
	0.001238	0.00343	0.019642	0.091752
	0.005674	0.002883	0.037905	0.079543
	0.003072	0.001621	0.038121	0.06258
	0.000932	0.002875	0.014498	0.086844
	0.004458	0.007581	0.007014	0.067005
	0.001938	0.002504	0.035346	0.070276
	0.000484	0.001578	0	0.02497
	0.002172	0.002632	0.025281	0.066208
	0.000844	0.002193	0	0.072599
	0.000701	0.001115	0	0.057465
	0.001429	0.0172	0.038971	0.058634
	0.002095	0.002656	0.044594	0.066111
	0.010618	0.007945	0.013279	0.075869
	0.002527	0.016482	0.002096	0.065545
	0.002286	0.001478	0.0375	0.053512
	0.008379	0.001878	0.054066	0.060429
	0.003171	0.001089	0.001338	0.076428
	0.001884	0.016791	0.023524	0.059312
	0.002439	0.001314	0.018981	0.06529
	0.003609	0.004913	0.031211	0.037236
	0.002523	0.003197	0.006165	0.043203
	0.003906	0.001582	0.0275	0.054689
	0.002128	0.000782	0.025553	0.049461
	0.000587	0.00092	0.034923	0.094071
	0.001826	0.001205	0.018626	0.072458
	0.001736	0.007259	0.036669	0.060716
	0.001725	0.001053	0.011924	0.056849
	0.006591	0.001149	0.004917	0.04432
	0.001824	0.000974	0.014418	0.061015
	0.001252	0.001371	0.034103	0.093439
	0.007998	0.011427	0.01569	0.049638
	0.010131	0.002663	0.017901	0.064854
	0.001438	0.004001	0.019368	0.05423
	0.008593	0.000827	0.024268	0.079659
	0.00528	0.003224	0.044371	0.078202
	0.000695	0.004803	0.037682	0.067643
	0.002497	0.020959	0.033978	0.065362
	0.003124	0.000549	0.034208	0.046386
	0.001064	0.009018	0.027005	0.04585
	0	0.003356	0.033809	0.068369
	0.000549	0.000939	0.036312	0.071322
	0.002194	0.024859	0.030555	0.080129
	0.004828	0.006509	0.034317	0.074958
	0.012664	0.008639	0.014779	0.081375
	0.00573	0.001674	0.020827	0.055343
	0.011124	0.001428	0.037624	0.070449
	0.0018	0.030806	0.046404	0.063881
	0.002539	0.014388	0.031285	0.077485
	0.010043	0.011964	0.026733	0.053066
	0.002698	0.003421	0.032243	0.069628
	0.002333	0.006908	0.032966	0.058961
	0.030204	0.008171	0.064008	0.019684
	0.006966	0.00163	0.014014	0
	0.010069	0.001588	0.037426	0.034703
	0.005376	0.018291	0.037949	0.02399
	0.004474	0.011577	0.020018	0.049924
	0.001093	0.004613	0.033774	0.032796
	0.011451	0.014513	0.019423	0.076409
	0.014904	0.007972	0.01988	0.051256
	0	0.003175	0.025054	0.064479
	0.002157	0.011163	0.0399	0.053231
	0.013422	0.017433	0.020618	0.050393
	0.004701	0.002468	0.040139	0.03416
	0.013138	0.007377	0.028846	0.082064
	0.00422	0.002176	0.029877	0.040598
	0.001801	0.010409	0.021802	0.051675
	0.001682	0.004224	0.029019	0.049998
	0.001986	0.001598	0.022941	0.031547
	0.002548	0.002667	0.019896	0.081598
	0.026592	0.002001	0.02308	0.043838
	0.00546	0.003433	0.014923	0.064394
	0.000999	0.007413	0.021055	0.05612
	0.011138	0.006438	0.047357	0.067281
	0.002552	0.010823	0.024332	0.054321
	0.018743	0.01809	0.042215	0.031307
	0.003517	0.009067	0.031938	0.06273
	0.00283	0.003715	0.022454	0.049973
	0.005164	0.002573	0.049039	0.04932
	0.002184	0.002557	0.030869	0.046683
	0.002658	0.029757	0.017451	0.070817
	0.001392	0.012893	0.027115	0.051587
	0.018646	0.005453	0.028875	0.045663
	0.005113	0.003704	0.029882	0.034598
	0.00275	0.004512	0.031204	0.072746
	0.001665	0.001912	0.025525	0.062284
	0.017712	0.003779	0.031655	0.058365
	0.001055	0.005618	0.02567	0.065163
	0.002392	0.003103	0.031722	0.0551
	0.009415	0.005338	0.001012	0.066118
	0.002835	0.002392	0.001329	0.052071
	0.004737	0.005193	0.016791	0.015189
	0.005247	0.010825	0.019994	0.039274
	0.003474	0.002609	0.023032	0.029106
	0.003387	0.008022	0.03324	0.058205
	0.00762	0.001628	0.021502	0.04624
	0.009182	0.005719	0.032855	0.043677
	0.005382	0.003228	0.022975	0.046444
	0.016377	0.002325	0.01184	0.057329
	0.005482	0.007398	0.027031	0.06186
	0.002118	0.001932	0.031965	0.044783
	0.008819	0.003899	0.01072	0.047563
	0.01023	0.012838	0.020768	0.058684
	0.003674	0.006223	0.03707	0.01896
	0.00056	0.002592	0.044595	0.03203
	0.002196	0.001788	0.029226	0.03219
	0.005833	0.021232	0.028131	0.062073
	0.009565	0.005551	0.009274	0.044867
	0.005461	0.001461	0.040052	0.04772
	0.002369	0.018052	0.059162	0.035294
	0.018767	0.017121	0.02768	0.039572
	0.001491	0.001938	0.026115	0.064431
	0.020445	0.017155	0.040398	0.051628
	0.005649	0.001584	0.039907	0.000867
	0.004984	0.006065	0.048407	0.012868
	0.023999	0.002494	0.024211	0.062052
	0.014705	0.002779	0.020787	0.020858
	0.01298	0.007146	0.038276	0.040968
	0.001042	0.008826	0.036643	0.062833
	0.014919	0.006109	0.039712	0.043223
	0.02311	0.006198	0.038084	0.038833
	0.001588	0.010315	0.040749	0.034605
	0.007043	0.003818	0.018471	0.062665
	0.017621	0.001303	0.046137	0.049202
	0.001116	0.003745	0.017537	0.035178
	0.002386	0.005301	0.020371	0.053639
	0.022144	0.005296	0.053719	0.047549
	0.002639	0.015948	0.000521	0.042553
	0.002348	0.020603	0.033381	0.038341
	0.003895	0.006005	0.025478	0.047907
	0.001361	0.003938	0.057384	0.024826
	0.007367	0.008711	0.006395	0.037328
	0.002816	0.005597	0.00061	0.039646
	0.006983	0.020889	0.051237	0.059273
	0.006547	0.00505	0.032827	0.03662
	0.005515	0.003597	0.036724	0.044699
	0.003879	0.005579	0.023527	0.030795
	0.003485	0.002495	0.000536	0.024153
	0.001734	0.009907	0.019477	0.056152
	0.011966	0.002069	0.02441	0.039084
	0.015528	0.002714	0.024021	0.046453
	0.00537	0.003391	0.022561	0.03813
	0.002869	0.002653	0.024234	0.066252
	0.001172	0.007557	0.029647	0.027823
	0.010072	0.007792	0.0611	0.071638
	0.000696	0.003183	0.028442	0.057205
	0.011627	0.001437	0.018416	0.039997
	0.008805	0.004695	0.02535	0.036281
	0.001947	0.00124	0.049526	0.034495
	0.001075	0.007943	0.03182	0.042964
	0.011519		0.03505	0.034199
	0.006332		0.035804	0.075712
	0.001786		0.034582	0.06619
	0.00255		0.027013	0.050281
	0.012639		0.02893	0.061849
	0.004375			0.075617
	0.00139			0.070819
	0.003779			0.04931
	0.001232			0.067613
	0.01129			0.052823
	0.002314			0.064844
				0.030534
				0.024178
				0.038567
				0.028016
				0.055284
				0.053483
				0.060487
				0.06059
				0.041429
				0.038437
				0.060541
				0.058873
				0.06383
				0.03441
				0.056326
				0.061794
				0.043259
				0.057212
				0.039841
				0.012369
				0.044926
				0.03623
				0.028752
				0.048407
				0.046718
				0.012899
				0.002699
				0.017215
				0.058148
				0.041996
				0.043126
				0.059061
				0.063181
				0.025212
				0.03352
				0.04035
				0.054747
				0.070209
				0.031233
				0.040885
				0.049834
				0.065014
				0.056805
				0.075315
				0.073929
				0.052034
				0.040072
				0.034806
				0.048806

## Sheet: B
			Repeat_1									Repeat_2									Repeat_3								Total cells analyzed
			cells				% cells_DnaN foci					cells				% cells_DnaN foci					cells				% cells_DnaN foci
		time (min)	0	1	≥2	total	0	1	≥2	total		0	1	≥2	total	0	1	≥2	total		0	1	≥2	total	0	1	≥2	total
MMC 0.5 µg/ml	wild type	0	54	39	11	104	51.9231	37.5	10.5769	100		93	82	32	207	44.9275	39.6135	15.4589	100		76	64	25	165	46.0606	38.7879	15.1515	100	476
		30	68	32	6	106	64.1509	30.1887	5.66038	100		106	94	34	234	45.2991	40.1709	14.5299	100		83	49	24	156	53.2051	31.4103	15.3846	100	496
		60	83	20	4	107	77.5701	18.6916	3.73832	100		130	64	24	218	59.633	29.3578	11.0092	100		98	47	20	165	59.3939	28.4848	12.1212	100	490
		90	80	21	1	102	78.4314	20.5882	0.980392	100		140	58	16	214	65.4206	27.1028	7.47664	100		108	41	11	160	67.5	25.625	6.875	100	476
	∆recA	0	50	41	17	108	46.2963	37.963	15.7407	100		44	36	26	106	41.5094	33.9623	24.5283	100		45	30	32	107	42.0561	28.0374	29.9065	100	321
		30	49	26	32	107	45.7944	24.2991	29.9065	100		44	33	20	97	45.3608	34.0206	20.6186	100		44	30	30	104	42.3077	28.8462	28.8462	100	308
		60	50	30	30	110	45.4545	27.2727	27.2727	100		47	19	35	101	46.5347	18.8119	34.6535	100		52	36	19	107	48.5981	33.6449	17.757	100	318
		90	54	36	26	116	46.5517	31.0345	22.4138	100		45	30	31	106	42.4528	28.3019	29.2453	100		50	38	22	110	45.4545	34.5455	20	100	332
	∆uvrA	0	201	6	0	207	97.1014	2.89855	0	100		211	2	1	214	98.5981	0.934579	0.46729	100		207	1	1	209	99.0431	0.478469	0.478469	100	630
		30	202	6	0	208	97.1154	2.88462	0	100		209	4	0	213	98.1221	1.87793	0	100		200	3	0	203	98.5222	1.47783	0	100	624
		60	208	2	0	210	99.0476	0.952381	0	100		203	3	0	206	98.5437	1.45631	0	100		205	5	0	210	97.619	2.38095	0	100	626
		90	206	1	0	207	99.5169	0.483092	0	100		211	2	0	213	99.061	0.938967	0	100		207	6	0	213	97.1831	2.8169	0	100	633
		time (min)	% cells with DnaN foci
	wild type	0	48.0769	55.0725	53.9394
		30	35.8491	54.7009	46.7949
		60	22.4299	40.367	40.6061
		90	21.5686	34.5794	32.5
	∆recA	0	53.7037	58.4906	57.9439
		30	54.2056	54.6392	57.6923
		60	54.5455	53.4653	51.4019
		90	53.4483	57.5472	54.5455
	∆uvrA	0	2.89855	1.40187	0.956938
		30	2.88462	1.87793	1.47783
		60	0.952381	1.45631	2.38095
		90	0.483092	0.938967	2.8169

## Sheet: D
	total flourescence intensity/cell length (a. u)
	0 min	90 min	0 min	90 min
	0.001615	0.000587	0.000367335	0.000793
	0.002251	0.0052	0.000588398	0.001146
	0.00075	0.00037	0.00339158	0.002611
	0.003452	0.002793	0.000895794	0.000875
	0.001586	0.001263	0.00111883	0.000655
	0.001312	0.005234	0.00158474	0.008651
	0.000667	0.01017	0.0034461	0.002283
	0.000964	0.006409	0.000997138	0.001059
	0.000638	0.00364	0.00837271	0.000566
	0.00976	0.001185	0.00177353	0.005627
	0.000481	0.00069	0.0301011	0.008235
	0.00621	0.002207	0.00262859	0.004242
	0.001531	0.004314	0.00634913	0.00145
	0.008049	0.001908	0.000898611	0.005402
	0.00133	0.001687	0.000691549	0.000404
	0.001507	0.001224	0.00150621	0.004823
	0.000446	0.002272	0.00175053	0.001228
	0.000751	0.014295	0.00314754	0.001339
	0.001048	0.002779	0.00154181	0.000665
	0.00692	0.000908	0.00250534	0.000903
	0.00109	0.003114	0.0091251	0.003065
	0.000884	0.001407	0.000896081	0.001464
	0.00648	0.001754	0.00992746	0.007342
	0.001349	0.001539	0.000851676	0.000936
	0.005744	0.000808	0.000382017	0.007033
	0.000463	0.003032	0.00334269	0.001727
	0.001824	0.001422	0.00410695	0.029335
	0.001184	0.008306	0.00187604	0.001218
	0.001808	0.000424	0.00154229	0.00128
	0.000556	0.000491	0.00881987	0.000673
	0.001616	0.000462	0.00449833	0.001876
	0.000624	0.001105	0.00627883	0.001455
	0.001097	0.002847	0.0128872	0.003239
	0.001103	0.000561	0.00564387	0.00078
	0.000611	0.003839	0.000678385	0.00111
	0.001708	0.001328	0.00120016	0.001319
	0.000916	0.00174	0.00213299	0.000547
	0.000991	0.012138	0.000956774	0.00054
	0.008805	0.001114	0.00300586	0.00388
	0.000605	0.000497	0.000834305	0.000923
	0.000802	0.000304	0.000681849	0.0014
	0.001304	0.001264	0.00333126	0.002953
	0.001834	0.000912	0.00465118	0.001951
	0.001184	0.001681	0.00774139	0.015691
	0.00783	0.002824	0.00119109	0.000476
	0.006504	0.001148	0.00424835	0.001434
	0.001222	0.000829	0.00219452	0.001285
	0.001904	0.006987	0.00553796	0.006444
	0.003108	0.000952	0.00103508	0.004717
	0.000601	0.002323	0.00102931	0.002017
	0.001167	0.003801	0.000459272	0.002227
	0.0006	0.001132	0.00366775	0.002733
	0.000997	0.000627	0.000645059	0.000769
	0.001989	0.005721	0.000712875	0.012869
	0.002237	0.000301	0.00154002	0.001989
	0.001093	0.000482	0.00104922	0.001536
	0.008264	0.000468	0.000871897	0.006628
	0.00571	0.001509	0.00318639	0.002207
	0.006642	0.000927	0.00165026	0.007154
	0.001676	0.000637	0.0105012	0.004212
	0.002121	0.000498	0.0015164	0.000584
	0.001396	0.00501	0.00259744	0.010117
	0.005002	0.000411	0.00401623	0.005084
	0.009421	0.00672	0.00606433	0.000684
	0.006821	0.001657	0.00257196	0.000748
	0.008709	8.31e-05	0.00134894	0.008193
	0.010176	0.002682	0.00424612	0.002239
	0.001535	0.009077	0.000575689	0.001741
	0.002756	0.001447	0.000667625	0.002154
	0.002323	0.000482	0.00289632	0.007537
	0.000563	0.001817	0.00157866	0.003305
	0.002102	0.000499	0.00144758	0.000732
	0.000947	0.001463	0.0021752	0.000829
	0.00152	0.002524	0.00351495	0.009151
	0.00067	0.000482	0.00519599	0.003027
	0.019234	0.002638	0.000574197	0.002982
	0.000746	0.010173	0.00102759	0.002192
	0.003681	0.004065	0.00498576	0.000864
	0.001245	0.000893	0.000898707	0.037527
	0.006204	0.003749	0.00319482	0.000983
	0.001021	0.016609	0.002968	0.002412
	0.001283	0.000697	0.00111297	0.000877
	0.03122	0.00122	0.000867838	0.01468
	0.000831	0.001535	0.00488033	0.003816
	0.000722	0.010134	0.00744089	0.000693
	0.003686	0.000542	0.00444397	0.002571
	0.001378	0.001047	0.00592828	0.002357
	0.000525	0.000894	0.00981906	0.001559
	0.008631	0.00604	0.00229909	0.0066
	0.000549	0.005643	0.00411758	0.001606
	0.001271	0.001244	0.00212744	0.000597
	0.004513	0.000353	0.00200009	0.001924
	0.002401	0.000744	0.000443241	0.001943
	0.003502	0.000612	0.000236963	0.003745
	0.004201	0.002019	0.00371841	0.00157
	0.001079	0.003953	0.000762301	0.001295
	0.000956	0.004753	0.00115531	0.002408
	0.001241	0.002895	0.000801355	0.001413
	0.016525	0.000647	0.00732597	0.001109
	0.002414	0.00366	0.00278561	0.001268
	0.000755	0.004776	0.00564258	0.010542
	0.001676	0.000712	0.00544566	0.004921
	0.006619	0.00163	0.00211083	0.001299
	0.004166	0.003819	0.00138653	0.010369
	0.004695	0.001214	0.00102766	0.000275
	0.001168	0.000565	0.00504443	0.00485
	0.001041	0.001374	0.000241803	0.004681
	0.000381	0.001257	0.00366188	0.001279
	0.004251	0.001233	0.0023674	0.00491
	0.000467	0.000884	0.000758464	0.001347
	0.003246	0.001665	0.0234481	0.001211
	0.000867	0.000505	0.00105847	0.001611
	0.000626	0.00241	0.00461289	0.002601
	0.002271	0.005196	0.00502385	0.001344
	0.000665	0.000777	0.000631453	0.002163
	0.002892	0.001112	0.0101594	0.001704
	0.002562	0.000899	0.00354999	0.004592
	0.006343	0.002009	0.000806441	0.002691
	0.002983	0.013695	0.00110951	0.000921
	0.003321	0.028319	0.0015613	0.001463
	0.005521	0.00093	0.00155443	0.011001
	0.003258	0.001448	0.00205707	0.00123
	0.000796	0.001485	0.00234676	0.001208
	0.006852	0.000923	0.00861241	0.002357
	0.001135	0.019409	0.00115732	0.007627
	0.00102	0.010571	0.00176233	0.014066
	0.009906	0.000754	0.00129329	0.001801
	0.007785	0.002485	0.00429938	0.001419
	0.006008	0.001095	0.00321281	0.00606
	0.000766	0.00062	0.00838492	0.001026
	0.00073	0.001722	0.00292806	0.035123
	0.002932	0.000836	0.00400592	0.001379
	0.004548	0.003657	0.0050347	0.007075
	0.009867	0.001459	0.00123743	0.002384
	0.008681	0.002766	0.00512308	0.002059
	0.000924	0.000658	0.00142586	0.006216
	0.009733	0.000666	0.00409959	0.001115
	0.006949	0.002078	0.00456274	0.001282
	0.004269	0.000731	0.00880826	0.002342
	0.000583	0.001135	0.000695108	0.007157
	0.008191	0.001245	0.00103639	0.00108
	0.002975	0.001214	0.00538514	0.001499
	0.000952	0.001301	0.00795857	0.001343
	0.002309	0.001603	0.00157982	0.00148
	0.001695	0.000838	0.0105034	0.002475
	0.001325	0.000302	0.00157631	0.001003
	0.001463	0.001797	0.00293775	0.002077
	0.004226	0.000406	0.0145934	0.001171
	0.000581	0.007378	0.00350547	0.000773
	0.000926	0.000559	0.00374754	0.015744
	0.002059	0.001892	0.0006677	0.001113
	0.003653	0.000906	0.00105082	0.007024
	0.004479	0.002807	0.00110005	0.001421
	0.001449	0.004205	0.0005883	0.003018
	0.002613	0.001322	0.00653791	0.002241
	0.000652	0.000739	0.00429367	0.004401
	0.000465	0.001134	0.00132451	0.002371
	0.000411	0.000258	0.00102519	0.001342
	0.00176	0.021163	0.00750731	0.00169
	0.001112	0.005025	0.00169648	0.010177
	0.002128	0.009624	0.00110216	0.000946
	0.008087	0.001677	0.00127537	0.008365
	0.006413	0.001162	0.000825102	0.003537
	0.002096	0.000966	0.00153309	0.0012
	0.001771	0.000924	0.00479489	0.0016
	0.004609	0.002289	0.0031204	0.00092
	0.001003	0.000843	0.00354674	0.005403
	0.003458	0.009228	0.00090987	0.00203
	0.001448	0.008919	0.00185353	0.001681
	0.001346	0.005074	0.00422889	0.00086
	0.001643	0.000679	0.00152022	0.002191
	0.001873	0.003845	0.0005987	0.001121
	0.003168	0.009682	0.00250115	0.001226
	0.001062	0.001586	0.00296073	0.006605
	0.002456	0.000576	0.00156475	0.000756
	0.000935	0.00062	0.0256885	0.004125
	0.001131	0.002469	0.000600553	0.001539
	0.002426	0.000723	0.00110319	0.001094
	0.009064	0.002056	0.00601614	0.001046
	0.001501	0.001453	0.00212027	0.000829
	0.017471	0.000359	0.00478768	0.000798
	0.000955	0.000441	0.00103156	0.001336
	0.000555	0.002198	0.00245693	0.014646
	0.013428	0.000503	0.00224142	0.000901
	0.000729	0.001086	0.00152889	0.0096
	0.000511	0.000978	0.00259578	0.001901
	0.002266	0.006065	0.00715564	0.002206
	0.001928	0.002775	0.00506679	0.001151
	0.006892	0.00015	0.00391858	0.001168
	0.00226	0.000852	0.00173894	0.009472
	0.000701	0.00602	0.000780845	0.002123
	0.003682	0.017014	0.000910414	0.000819
	0.000738	0.001064	0.00123372	0.001642
	0.005969	0.000239	0.00285132	0.000691
	0.003178	0.0012	0.000707181	0.001437
	0.002205	0.012227	0.00133116	0.00414
	0.006907	0.001063	0.00114757	0.003445
	0.000373	0.000557	0.00133614	0.00237
	0.001617	0.00134	0.000715927	0.003774
	0.008031	0.000738	0.0360898	0.001944
	0.001074	0.000517	0.00632375	0.001138
	0.001385	0.000451	0.00553065	0.001307
	0.001959	0.002119	0.00342368	0.002314
	0.015887	0.000654	0.00122045	0.00103
	0.010603	0.000551	0.000457931	0.019112
	0.007479	0.000827	0.00156793	0.006152
	0.005247	0.001079	0.00654048	0.001635
	0.001769	0.000497	0.00220308	0.000882
	0.006121	0.005704	0.00229242	0.001638
	0.002991	0.00339	0.00238416	0.001078
	0.001419	0.005662	0.00180682	0.0044
	0.000862	0.000549	0.00151845	0.004589
	0.004168	0.001171	0.000726657	0.004372
	0.006365	0.001295	0.00131499	0.000835
	0.001725	0.001544	0.00971294	0.004146
	0.020383	0.000336	0.00310883	0.001214
	0.016944	0.001455	0.00285696	0.000612
	0.001573	0.000879	0.00243444	0.000323
	0.001389	0.000863	0.000849538	0.002386
	0.004495	0.00086	0.00106332	0.010846
	0.007617	0.002336	0.0016631	0.000887
	0.00074	0.002708	0.00180689	0.005333
	0.003956	0.008417	0.00161623	0.003099
	0.004558	0.001174	0.0136156	0.003839
	0.000642	0.00219	0.000708124	0.000949
	0.001101	0.000983	0.0177423	0.001524
	0.002843	0.001089	0.00319099	0.00137
	0.020436	0.001572	0.00525563	0.001513
	0.000827	0.001142	0.00661433	0.00097
	0.00436	0.00118	0.00142407	0.002388
	0.003017	0.007226	0.000411363	0.004743
	0.001648	0.000535	0.00116991	0.014182
	0.001016	0.000837	0.00383912	0.0013
	0.00198	0.002457	0.00472748	0.002617
	0.003829	0.002714	0.0024316	0.001911
	0.001958	0.038342	0.00452681	0.001781
	0.004651	0.003003	0.0133554	0.000812
	0.002076	0.000677	0.00997454	0.000945
	0.003497	0.004659	0.00203745	0.011483
	0.00076	0.002241	0.0062495	0.007415
	0.008202	0.000619	0.000816402	0.000574
	0.000829	0.002093	0.00489432	0.001417
	0.003516	0.004216	0.00980463	0.00264
	0.003706	0.003435	0.00423892	0.002799
	0.005444	0.003735	0.000493788	0.00193
	0.002491	0.000456	0.000423727	0.002353
	0.002793	0.002269	0.0013101	0.000933
	0.003551	0.003577	0.00228219	0.001069
	0.011016	0.000559	0.0226962	0.00294
	0.001744	0.000882	0.000480397	0.000987
	0.001251	0.000657	0.0100397	0.003495
	0.001006	0.00067	0.00148647	0.000639
	0.01385	0.000636	0.000568236	0.001991
	0.001675	0.000835	0.000975167	0.001041
	0.00421	0.000608	0.00135343	0.000663
	0.00597	0.001011	0.00395959	0.004429
	0.001274	0.00075	0.00394552	0.000571
	0.004623	0.000853	0.00342626	0.001127
	0.000496	0.000367	0.00236702	0.000809
	0.001911	0.001122	0.00405941	0.001582
	0.001349	0.002244	0.00911256	0.003329
	0.008255	0.001679	0.0175124	0.010958
	0.001728	0.00532	0.00109475	0.00094
	0.005636	0.000763	0.00328552	0.008204
	0.001324	0.001968	0.0115239	0.000937
	0.002446	0.000472	0.00312956	0.000672
	0.001248	0.000524	0.00837816	0.000938
	0.001504	0.000785	0.000885444	0.001669
	0.002454	0.003399	0.0227674	0.001942
	0.000446	0.000665	0.00356412	0.001304
	0.000609	0.000554	0.00280583	0.002076
	0.001228	0.000501	0.000903292	0.000591
	0.00292	0.012454	0.00073864	0.001158
	0.008709	0.000602	0.00517852	0.00129
	0.00057	0.000643	0.00114599	0.002964
	0.002462	0.000734	0.00252663	0.003004
	0.004184	0.000785	0.00439796	0.003616
	0.006387	0.003754	0.0062703	0.024781
	0.003427	0.00943	0.00340955	0.001209
	0.002851	0.002327	0.00202548	0.007637
	0.001045	0.003274	0.00155166	0.001916
	0.000605	0.000554	0.00492245	0.00142
	0.000725	0.00072	0.000714939	0.001799
	0.007757	0.001699	0.0346132	0.00068
	0.001081	0.001031	0.000455371	0.00187
	0.002453	0.00146	0.00282962	0.002143
	0.002113	0.002023	0.00127374	0.001724
	0.00121	0.001362	0.00259111	0.010844
	0.000945	0.002649	0.000712498	0.000956
	0.000914	0.000586	0.0052159	0.000715
	0.011379	0.000922	0.00421815	0.001566
	0.003928	0.001582	0.00546614	0.001079
	0.002653	0.00049	0.00638806	0.002474
	0.001064	0.004674	0.000653353	0.012862
	0.006627	0.001177	0.00238532	0.003554
	0.011118	0.001443	0.0122709	0.001723
	0.00054	0.001369	0.000430495	0.000911
	0.000931	0.002041	0.00199054	0.009916
	0.002967	0.000416	0.00149988	0.002146
	0.006228	0.000757	0.00158524	0.003322
	0.001595	0.00044	0.00231689	0.001168
	0.001619	0.000967	0.00270899	0.000908
	0.000627	0.0005	0.00227944	0.004932
	0.003545	0.000989	0.00286883	0.001434
	0.000899	0.000712	0.00828905	0.001477
	0.001744	0.000159	0.000747859	0.006658
	0.000855	0.00077	0.00240146	0.001062
	0.001369	0.0018	0.00358267	0.017503
	0.00659	0.00377	0.00364646	0.003483
	0.001058	0.00022	0.00173487	0.001469
	0.000943	0.002442	0.000616391	0.001001
	0.000969	0.000544	0.00584308	0.001308
	0.00124	0.002969	0.00103845	0.006775
	0.00368	0.004045	0.00058615	0.001151
	0.002262	0.000942	0.00136234	0.000952
	0.001104	0.003701	0.00113158	0.001796
	0.000844	0.001163	0.000882338	0.000831
	0.002756	0.000852	0.000757303	0.000381
	0.002289	0.009081	0.00217254	0.003797
	0.001665	0.003044	0.00108473	0.001883
	0.001734	0.001316	0.00658317	0.009707
	0.000658		0.00045591	0.00107
	0.000664		0.0124299	0.009275
	0.010235		0.000459275	0.000507
	0.006194		0.00150412	0.002585
	0.002707		0.00141879	0.000604
	0.016053		0.00158642	0.002271
	0.001845		0.011903	0.004498
	0.000869		0	0.001223
	0.001746		0.0135648	0.001986
	0.001105		0.00364972	0.003211
	0.002075		0.00401451	0.00119
	0.005123			0.00248
	0.00063			0.009925
	0.004608			0.001863
	0.001292			0.005198
	0.003351			0.00164
	0.001827			0.000844
	0.000571			0.002737
	0.000755			0.000774
	0.037286			0.000383
	0.000975			0.001225
	0.00215			0.018848
	0.001101			0.002156
	0.000454			0.001274
	0.00019			0.001202
	0.000667			0.001829
	0.001246			0.003395
	0.000815			0.000582
	0.001935			0.004917
	0.000376			0.004445
	0.002718			0.001032
	0.000487			0.00073
	0.035805			0.001193
	0.003939			0.002614
	0.000923			0.007406
	0.00051			0.00258
	0.005846			0.00246
	0.002475			0.001635
	0.000194			0.001127
	0.001394			0.002903
	0.001149			0.001305
	0.001578			0.001619
	0.008832			0.001944
	0.002444			0.005814
	0.012296			0.000847
	0			0.000811
				0.003837
				0.002196
				0.004699
				0.000685
				0.000368
				0.000764
				0.000779
				0.000675
				0.006139
				0.007633
				0.000851
				0.004111
				0.000651
				0.001169
				0.002224
				0.001296
				0.001345
				0.003841
				0.000999
				0.001691
				0.002443
				0.00047
				0.00058
				0.001105
				0.001117
				0.000604
				0.003663
				0.002422
				0.000506
				0.000714
				0.000891
				0.00237
				0.004841
				0.000745
				0.002067
				0.00518
				0.005342
				0.003698
				0.002938
				0.002477
				0.000609
				0.001208
				0.000995
				0.000968
				0.008813
				0.001395
				0.002167
				0.000792
				0.002339
				0.001019
				0.001107
				0.001378
				0.00235
				0.000471
				0.001993
				0.00032
				0.000456
				0.002201
				0.004361
				0.000492
				0.000854
				0.002102
				0.003085
				0.000487
				0.006312
				0.002266
				0.000521
				0.002337
				0.000693
				0.000814
				0.000742
				0.001513
				0.000631
				0.000365
				0.00467
				0.003608
				0.000506
				0.000534
				0.000968
				0.003416
				0.001861
				0.003229
				0.001265
				0.002567
				0.001155
				0.008212
				0.002395
				0.00539
				0.011301
				0.010126
				0.007141
				0.002272
				0.0175
