# Supplementary material for: Coordination between nucleotide excision repair and specialized polymerase DnaE2 action enables DNA damage survival in non-replicating bacteria
Source: eLife. 2021 Apr 15;10:e67552. doi: 10.7554/eLife.67552 (PMC8102061; doi:10.7554/eLife.67552)
Supplement: Figure 4—figure supplement 1—source data 1. [file elife-67552-fig4-figsupp1-data1.xlsx]

## Sheet: A
		Repeat_1									Repeat_2									Repeat_3								Total cells analyzed
MMC 0.5 µg/ml		cells_DnaN foci				% cells_DnaN foci					cells_DnaN foci				% cells_DnaN foci					cells_DnaN foci				% cells_DnaN foci
	time (min)	0	1	≥2	total	0	1	≥2	total		0	1	≥2	total	0	1	≥2	total		0	1	≥2	total	0	1	≥2	total
wild type	0	54	39	11	104	51.9231	37.5	10.5769	100		93	82	32	207	44.9275	39.6135	15.4589	100		76	64	25	165	46.0606	38.7879	15.1515	100	476
	30	68	32	6	106	64.1509	30.1887	5.66038	100		106	94	34	234	45.2991	40.1709	14.5299	100		83	49	24	156	53.2051	31.4103	15.3846	100	496
	60	83	20	4	107	77.5701	18.6916	3.73832	100		130	64	24	218	59.633	29.3578	11.0092	100		98	47	20	165	59.3939	28.4848	12.1212	100	490
	90	80	21	1	102	78.4314	20.5882	0.980392	100		140	58	16	214	65.4206	27.1028	7.47664	100		108	41	11	160	67.5	25.625	6.875	100	476
∆recN	0	50	30	21	101	49.505	29.703	20.7921	100		52	37	14	103	50.4854	35.9223	13.5922	100		53	31	21	105	50.4762	29.5238	20	100	309
	30	68	34	7	109	62.3853	31.1927	6.42202	100		77	23	12	112	68.75	20.5357	10.7143	100		72	30	5	107	67.2897	28.0374	4.6729	100	328
	60	84	15	6	105	80	14.2857	5.71429	100		80	28	6	114	70.1754	24.5614	5.26316	100		76	23	2	101	75.2475	22.7723	1.9802	100	320
	90	90	18	4	112	80.3571	16.0714	3.57143	100		86	18	5	109	78.8991	16.5138	4.58716	100		85	19	8	112	75.8929	16.9643	7.14286	100	333
		% cells_DnaN foci
		0			1			≥2
wild type	0	51.9231	44.9275	46.0606	37.5	39.6135	38.7879	10.5769	15.4589	15.1515
	30	64.1509	45.2991	53.2051	30.1887	40.1709	31.4103	5.66038	14.5299	15.3846
	60	77.5701	59.633	59.3939	18.6916	29.3578	28.4848	3.73832	11.0092	12.1212
	90	78.4314	65.4206	67.5	20.5882	27.1028	25.625	0.980392	7.47664	6.875
∆recN	0	49.505	50.4854	50.4762	29.703	35.9223	29.5238	20.7921	13.5922	20
	30	62.3853	68.75	67.2897	31.1927	20.5357	28.0374	6.42202	10.7143	4.6729
	60	80	70.1754	75.2475	14.2857	24.5614	22.7723	5.71429	5.26316	1.9802
	90	80.3571	78.8991	75.8929	16.0714	16.5138	16.9643	3.57143	4.58716	7.14286

## Sheet: C
			Repeat_1									Repeat_2									Repeat_3								Total cells analyzed
			cells_DnaN foci				% cells_DnaN foci					cells_DnaN foci				% cells_DnaN foci					cells_DnaN foci				% cells_DnaN foci
	MMC (µg/ml)	time (min)	0	1	>2	total	0	1	>2	total		0	1	>2	total	0	1	>2	total		0	1	>2	total	0	1	>2	total
wild type	0.125	0	98	8	3	109	89.9083	7.33945	2.75229	100		102	9	1	112	91.0714	8.03571	0.892857	100		102	8	2	112	91.0714	7.14286	1.78571	100	333
		90	109	2	1	112	97.3214	1.78571	0.892857	100		117	2	0	119	98.3193	1.68067	0	100		109	3	0	112	97.3214	2.67857	0	100	343
	0.25	0	95	10	3	108	87.963	9.25926	2.77778	100		103	14	3	120	85.8333	11.6667	2.5	100		99	12	5	116	85.3448	10.3448	4.31034	100	344
		90	102	3	0	105	97.1429	2.85714	0	100		118	2	1	121	97.5207	1.65289	0.826446	100		115	3	2	120	95.8333	2.5	1.66667	100	346
	0.5	0	54	39	11	104	51.9231	37.5	10.5769	100		93	82	32	207	44.9275	39.6135	15.4589	100		76	64	25	165	46.0606	38.7879	15.1515	100	476
		90	80	21	1	102	78.4314	20.5882	0.980392	100		140	58	16	214	65.4206	27.1028	7.47664	100		108	41	11	160	67.5	25.625	6.875	100	476
	0.75	0	60	62	28	150	40	41.3333	18.6667	100		47	36	27	110	42.7273	32.7273	24.5455	100		46	38	29	113	40.708	33.6283	25.6637	100	373
		90	61	39	7	107	57.0093	36.4486	6.54206	100		64	27	15	106	60.3774	25.4717	14.1509	100		60	38	10	108	55.5556	35.1852	9.25926	100	321
∆dnaE2	0.125	0	96	13	2	111	86.4865	11.7117	1.8018	100		108	18	2	128	84.375	14.0625	1.5625	100		107	13	5	125	85.6	10.4	4	100	364
		90	94	7	1	102	92.1569	6.86275	0.980392	100		105	12	1	118	88.9831	10.1695	0.847458	100		109	11	1	121	90.0826	9.09091	0.826446	100	341
	0.25	0	88	18	2	108	81.4815	16.6667	1.85185	100		96	18	5	119	80.6723	15.1261	4.20168	100		88	19	4	111	79.2793	17.1171	3.6036	100	338
		90	105	10	3	118	88.9831	8.47458	2.54237	100		104	15	3	122	85.2459	12.2951	2.45902	100		98	13	4	115	85.2174	11.3043	3.47826	100	355
	0.5	0	47	31	29	107	43.9252	28.972	27.1028	100		76	127	22	225	33.7778	56.4444	9.77778	100		63	68	25	156	40.3846	43.5897	16.0256	100	488
		90	45	45	12	102	44.1176	44.1176	11.7647	100		72	122	23	217	33.1797	56.2212	10.5991	100		68	67	26	161	42.236	41.6149	16.1491	100	480
	0.75	0	41	41	34	116	35.3448	35.3448	29.3103	100		38	44	37	119	31.9328	36.9748	31.0924	100		46	55	26	127	36.2205	43.3071	20.4724	100	362
		90	42	57	16	115	36.5217	49.5652	13.913	100		47	67	14	128	36.7188	52.3438	10.9375	100		41	39	24	104	39.4231	37.5	23.0769	100	347
			% cells with DnaN foci
wild type	0.125	0	10.0917	8.92857	8.92857
		90	2.67857	1.68067	2.67857
	0.25	0	12.037	14.1667	14.6552
		90	2.85714	2.47934	4.16667
	0.5	0	48.0769	55.0725	53.9394
		90	21.5686	34.5794	32.5
	0.75	0	60	57.2727	59.292
		90	42.9907	39.6226	44.4444
∆dnaE2	0.125	0	13.5135	15.625	14.4
		90	7.84314	11.0169	9.91736
	0.25	0	18.5185	19.3277	20.7207
		90	11.0169	14.7541	14.7826
	0.5	0	56.0748	66.2222	59.6154
		90	55.8824	66.8203	57.764
	0.75	0	64.6552	68.0672	63.7795
		90	63.4783	63.2812	60.5769

## Sheet: D
			Repeat_1									Repeat_2									Repeat_3								Total cells analyzed
			cells_DnaN foci				% cells_DnaN foci					cells_DnaN foci				% cells_DnaN foci					cells_DnaN foci				% cells_DnaN foci
	UV (J/m2)	time (min)	0	1	≥2	total	0	1	≥2	total		0	1	≥2	total	0	1	≥2	total		0	1	≥2	total	0	1	≥2	total
wild type	75	90	96	7	0	103	93.2039	6.79612	0	100		111	9	1	121	91.7355	7.43802	0.826446	100		97	11	0	108	89.8148	10.1852	0	100	332
∆dnaE2		90	134	21	4	159	84.2767	13.2075	2.51572	100		92	20	2	114	80.7018	17.5439	1.75439	100		96	16	2	114	84.2105	14.0351	1.75439	100	387
wild type	150	90	89	37	6	132	67.4242	28.0303	4.54545	100		75	33	2	110	68.1818	30	1.81818	100		74	36	9	119	62.1849	30.2521	7.56303	100	361
∆dnaE2		90	53	58	13	124	42.7419	46.7742	10.4839	100		63	56	8	127	49.6063	44.0945	6.29921	100		60	51	12	123	48.7805	41.4634	9.7561	100	374
			% cells with DnaN foci
wild type	75	90	6.79612	8.26446	10.1852
∆dnaE2		90	15.7233	19.2982	15.7895
wild type	150	90	32.5758	31.8182	37.8151
∆dnaE2		90	57.2581	50.3937	51.2195

## Sheet: G
MMC 0.5 (µg/ml)					Rif colonies										Total Rif colonies/ml	Mutants	mutants/109 cells
				viable counts/ml	1	2	3	4	5	6	7	8	9	10
wild type	Repeat_1	no recovery	control	3.33333e+10	14	16	7	13	13	11	17	13	18	11	133	3.99e-09	3.99
			MMC	3.33333e+10	100	45	76	108	97	88	86	75	102	80	857	2.571e-08	25.7
		recovery	control	50000000000	30	25	46	37	30	31	42	45	40	30	356	7.12e-09	7.12
			MMC	50000000000	120	198	173	203	188	202	216	182	177	176	1835	3.67e-08	36.7
	Repeat_2	no recovery	control	3.16667e+10	17	38	32	21	33	23	17	21	23	21	246	7.76842e-09	7.7
			MMC	35000000000	131	125	140	145	143	50	125	131	123	129	1242	3.54857e-08	35.5
		recovery	control	30000000000	46	43	51	46	46	40	49	50	40	45	456	1.52e-08	15.2
			MMC	35000000000	173	189	226	229	190	169	168	194	177	89	1804	5.15429e-08	51.5
	Repeat_3	no recovery	control	50000000000	27	22	26	18	23	11	16	24	14	8	189	3.78e-09	3.78
			MMC	62000000000	125	117	137	129	127	26	131	124	142	137	1195	1.92742e-08	19.3
		recovery	control	34000000000	26	33	25	31	23	41	28	34	4	29	274	8.05882e-09	8.06
			MMC	34000000000	162	186	151	136	162	148	141	138	141	113	1478	4.34706e-08	43.5
∆dnaE2	Repeat_1	no recovery	control	38000000000	20	25	17	31	13	25	25	29	18	15	218	5.73684e-09	5.7
			MMC	90000000000	46	47	47	48	62	15	54	45	36	47	447	4.96667e-09	4.9
		recovery	control	20000000000	34	22	24	25	22	21	33	29	14	27	251	1.255e-08	12.6
			MMC	52000000000	104	103	131	91	31	104	107	100	86	115	972	1.86923e-08	18.7
	Repeat_2	no recovery	control	13400000000	18	11	14	5	5	10	10	15	11	16	115	8.58209e-09	8.6
			MMC	43600000000	38	53	44	50	36	51	55	42	46	32	447	1.02523e-08	10.3
		recovery	control	1.66667e+10	19	25	19	18	18	26	19	28	16	27	215	1.29e-08	12.9
			MMC	6.66667e+10	72	78	59	78	73	56	68	54	57	54	649	9.735e-09	9.7
	Repeat_3	no recovery	control	19200000000	18	20	20	12	13	19	21	16	8	18	165	8.59375e-09	8.6
			MMC	40000000000	56	35	50	42	20	36	44	41	35	40	399	9.975e-09	9.9
		recovery	control	42000000000	29	33	32	35	47	44	36	43	52	35	386	9.19048e-09	9.2
			MMC	86000000000	75	75	85	102	98	88	54	79	96	56	808	9.39535e-09	9.4
