# Supplementary material for: Coordination between nucleotide excision repair and specialized polymerase DnaE2 action enables DNA damage survival in non-replicating bacteria
Source: eLife. 2021 Apr 15;10:e67552. doi: 10.7554/eLife.67552 (PMC8102061; doi:10.7554/eLife.67552)
Supplement: Figure 4—source data 1. [file elife-67552-fig4-data1.xlsx]

## Sheet: B
		Repeat_1									Repeat_2									Repeat_3								Total cells analyzed
MMC 0.5 µg/ml		cells				% cells_DnaN foci					cells				% cells_DnaN foci					cells				% cells_DnaN foci
	time (min)	0	1	≥2	total	0	1	≥2	total		0	1	≥2	total	0	1	≥2	total		0	1	≥2	total	0	1	≥2	total
wild type	0	54	39	11	104	51.9231	37.5	10.5769	100		93	82	32	207	44.9275	39.6135	15.4589	100		76	64	25	165	46.0606	38.7879	15.1515	100	476
	30	68	32	6	106	64.1509	30.1887	5.66038	100		106	94	34	234	45.2991	40.1709	14.5299	100		83	49	24	156	53.2051	31.4103	15.3846	100	496
	60	83	20	4	107	77.5701	18.6916	3.73832	100		130	64	24	218	59.633	29.3578	11.0092	100		98	47	20	165	59.3939	28.4848	12.1212	100	490
	90	80	21	1	102	78.4314	20.5882	0.980392	100		140	58	16	214	65.4206	27.1028	7.47664	100		108	41	11	160	67.5	25.625	6.875	100	476
∆dnaE2	0	47	31	29	107	43.9252	28.972	27.1028	100		76	127	22	225	33.7778	56.4444	9.77778	100		63	68	25	156	40.3846	43.5897	16.0256	100	488
	30	45	40	17	102	44.1176	39.2157	16.6667	100		66	111	27	204	32.3529	54.4118	13.2353	100		66	73	22	161	40.9938	45.3416	13.6646	100	467
	60	49	47	10	106	46.2264	44.3396	9.43396	100		68	123	20	211	32.2275	58.2938	9.47867	100		65	69	26	160	40.625	43.125	16.25	100	477
	90	45	45	12	102	44.1176	44.1176	11.7647	100		72	122	23	217	33.1797	56.2212	10.5991	100		68	67	26	161	42.236	41.6149	16.1491	100	480
		% cells_DnaN foci
		0			1			≥2
wild type	0	51.9231	44.9275	46.0606	37.5	39.6135	38.7879	10.5769	15.4589	15.1515
	30	64.1509	45.2991	53.2051	30.1887	40.1709	31.4103	5.66038	14.5299	15.3846
	60	77.5701	59.633	59.3939	18.6916	29.3578	28.4848	3.73832	11.0092	12.1212
	90	78.4314	65.4206	67.5	20.5882	27.1028	25.625	0.980392	7.47664	6.875
∆dnaE2	0	43.9252	33.7778	40.3846	28.972	56.4444	43.5897	27.1028	9.77778	16.0256
	30	44.1176	32.3529	40.9938	39.2157	54.4118	45.3416	16.6667	13.2353	13.6646
	60	46.2264	32.2275	40.625	44.3396	58.2938	43.125	9.43396	9.47867	16.25
	90	44.1176	33.1797	42.236	44.1176	56.2212	41.6149	11.7647	10.5991	16.1491

## Sheet: C
			Repeat_1									Repeat_2									Repeat_3								Total cells analyzed
			cells				% cells					cells				% cells					cells				% cells
MMC 0.5 µg/ml		time (min)	0	1	>2	total	0	1	>2	total		0	1	>2	total	0	1	>2	total		0	1	>2	total	0	1	>2	total
wild type	Ssb	0	27	56	33	116	23.2759	48.2759	28.4483	100		22	44	43	109	20.1835	40.367	39.4495	100		16	41	43	100	16	41	43	100	325
		90	61	51	21	133	45.8647	38.3459	15.7895	100		40	40	23	103	38.835	38.835	22.3301	100		102	99	52	253	40.3162	39.1304	20.5534	100	489
	DnaE	0	83	61	14	158	52.5316	38.6076	8.86076	100		59	37	8	104	56.7308	35.5769	7.69231	100		55	44	5	104	52.8846	42.3077	4.80769	100	366
		90	113	40	7	160	70.625	25	4.375	100		69	32	6	107	64.486	29.9065	5.60748	100		64	29	11	104	61.5385	27.8846	10.5769	100	371
∆dnaE2	Ssb	0	31	57	26	114	27.193	50	22.807	100		29	51	49	129	22.4806	39.5349	37.9845	100		22	49	40	111	19.8198	44.1441	36.036	100	354
		90	33	42	27	102	32.3529	41.1765	26.4706	100		20	42	43	105	19.0476	40	40.9524	100		46	98	107	251	18.3267	39.0438	42.6295	100	458
	DnaE	0	67	51	40	158	42.4051	32.2785	25.3165	100		57	52	12	121	47.1074	42.9752	9.91736	100		49	36	18	103	47.5728	34.9515	17.4757	100	382
		90	71	50	35	156	45.5128	32.0513	22.4359	100		60	35	28	123	48.7805	28.4553	22.7642	100		49	38	17	104	47.1154	36.5385	16.3462	0	383
			% cells with foci
wild type	Ssb	0	76.7241	79.8165	84
		90	54.1353	61.165	59.6838
	DnaE	0	47.4684	43.2692	47.1154
		90	29.375	35.514	38.4615
∆dnaE2	Ssb	0	72.807	77.5194	80.1802
		90	67.6471	80.9524	81.6733
	DnaE	0	57.5949	52.8926	52.4272
		90	54.4872	51.2195	52.8846

## Sheet: D
		Repeat_1									Repeat_2									Repeat_3								Total cells analyzed
MMC 0.5 µg/ml		cells				% cells_DnaN foci					cells				% cells_DnaN foci					cells				% cells_DnaN foci
	time (min)	0	1	≥2	total	0	1	≥2	total		0	1	≥2	total	0	1	≥2	total		0	1	≥2	total	0	1	≥2	total
wild type	0	54	39	11	104	51.9231	37.5	10.5769	100		93	82	32	207	44.9275	39.6135	15.4589	100		76	64	25	165	46.0606	38.7879	15.1515	100	476
	30	68	32	6	106	64.1509	30.1887	5.66038	100		106	94	34	234	45.2991	40.1709	14.5299	100		83	49	24	156	53.2051	31.4103	15.3846	100	496
	60	83	20	4	107	77.5701	18.6916	3.73832	100		130	64	24	218	59.633	29.3578	11.0092	100		98	47	20	165	59.3939	28.4848	12.1212	100	490
	90	80	21	1	102	78.4314	20.5882	0.980392	100		140	58	16	214	65.4206	27.1028	7.47664	100		108	41	11	160	67.5	25.625	6.875	100	476
DnaE2*	0	50	59	47	156	32.0513	37.8205	30.1282	100		34	51	18	103	33.0097	49.5146	17.4757	100		42	41	27	110	38.1818	37.2727	24.5455	100	369
	30	45	75	38	158	28.481	47.4684	24.0506	100		35	88	29	152	23.0263	57.8947	19.0789	100		43	49	19	111	38.7387	44.1441	17.1171	100	421
	60	50	70	34	154	32.4675	45.4545	22.0779	100		47	81	20	148	31.7568	54.7297	13.5135	100		40	39	32	111	36.036	35.1351	28.8288	100	413
	90	35	49	30	114	30.7018	42.9825	26.3158	100		44	91	17	152	28.9474	59.8684	11.1842	100		40	60	15	115	34.7826	52.1739	13.0435	100	381
∆imuB	0	45	38	31	114	39.4737	33.3333	27.193	100		46	38	29	113	40.708	33.6283	25.6637	100		49	45	24	118	41.5254	38.1356	20.339	100	345
	30	41	56	11	108	37.963	51.8519	10.1852	100		47	52	20	119	39.4958	43.6975	16.8067	100		51	44	31	126	40.4762	34.9206	24.6032	100	353
	60	43	49	18	110	39.0909	44.5455	16.3636	100		48	44	29	121	39.6694	36.3636	23.9669	100		48	50	22	120	40	41.6667	18.3333	100	351
	90	47	46	22	115	40.8696	40	19.1304	100		46	52	14	112	41.0714	46.4286	12.5	100		48	51	16	115	41.7391	44.3478	13.913	100	342
	time (min)	% cells with DnaN foci
wild type	0	48.0769	55.0725	53.9394
	30	35.8491	54.7009	46.7949
	60	22.4299	40.367	40.6061
	90	21.5686	34.5794	32.5
DnaE2*	0	67.9487	66.9903	61.8182
	30	71.519	76.9737	61.2613
	60	67.5325	68.2432	63.964
	90	69.2982	71.0526	65.2174
∆imuB	0	60.5263	59.292	58.4746
	30	62.037	60.5042	59.5238
	60	60.9091	60.3306	60
	90	59.1304	58.9286	58.2609
