# Supplementary material for: Coordination between nucleotide excision repair and specialized polymerase DnaE2 action enables DNA damage survival in non-replicating bacteria
Source: eLife. 2021 Apr 15;10:e67552. doi: 10.7554/eLife.67552 (PMC8102061; doi:10.7554/eLife.67552)
Supplement: Figure 5—figure supplement 1—source data 1. [file elife-67552-fig5-figsupp1-data1.xlsx]

## Sheet: B
	no recovery								recovery (90 min)
	C				MMC				C				MMC
asynchronous	wild type		∆dnaE2		wild type		∆dnaE2		wild type		∆dnaE2		wild type		∆dnaE2
	0 min	240 min	0 min	240 min	0 min	240 min	0 min	240 min	0 min	240 min	0 min	240 min	0 min	240 min	0 min	240 min
2.58777	3.21221	2.08935	3.07586	2.05293	3.08024	4.44851	2.8793	5.53761	5.03533	9.28931	3.41244	8.54469	3.93024	13.0761	4.54068	4.97642
3.05998	3.53515	2.3054	2.97073	2.77385	3.21561	4.99177	3.14781	3.38192	4.57369	2.77101	4.88359	3.34653	5.12493	6.8124	7.59902	1.89422
2.77244	4.6036	2.9551	3.46769	2.28325	3.00466	6.6297	3.29337	3.6795	3.67727	2.97083	5.33017	2.67128	3.3321	9.23169	5.47127	10.1269
3.60172	2.66137	3.03847	3.07162	1.83597	3.25998	6.86272	3.60014	6.4417	5.88709	3.56013	4.72973	7.70439	4.70358	8.93707	5.5561	10.0723
3.06721	3.77737	2.92401	4.2464	2.10625	3.38941	4.57873	3.2417	3.32403	3.78382	4.2422	1.80214	9.91441	3.9597	3.16701	3.69031	1.94532
2.58962	3.94303	3.11449	3.63996	2.16966	3.85961	8.14332	3.6147	3.98629	3.90668	2.02761	4.1557	2.97204	2.76654	1.87884	5.62326	3.55819
2.81976	3.12284	3.10905	2.96229	1.85292	3.8605	4.13874	3.12681	7.97487	5.53643	2.99718	4.91359	2.85762	5.58209	2.75565	5.70884	4.24742
3.05477	3.77578	3.30536	3.17388	2.42504	3.40664	4.29476	3.65214	6.61567	4.35678	1.70992	5.21784	3.49172	5.13879	7.75573	4.08774	7.5999
3.33282	3.85213	2.40621	3.33873	1.67322	2.66616	5.62355	3.03807	9.75507	4.76529	2.53343	5.03059	4.19727	4.17168	1.65602	3.70893	5.75047
2.77808	3.47308	1.94897	3.10211	1.53109	3.20476	5.8402	3.66929	6.03603	5.2561	3.23139	6.89876	2.51379	4.5022	2.2994	5.3276	5.48726
2.86542	3.45358	1.22156	3.49724	2.01272	4.37059	8.03209	3.10516	1.84828	7.48467	3.95616	4.49913	2.58251	5.88362	7.15666	5.45995	9.17535
3.11629	3.39637	2.35823	3.6904	1.49786	3.04074	5.78834	4.16404	2.38455	3.16824	3.90754	5.22258	2.81938	3.66252	3.87648	4.55468	3.71692
2.96046	3.70826	1.84688	2.88318	2.42065	3.73466	5.6812	3.00974	6.94433	4.4382	1.87182	4.61865	2.85204	4.92391	7.43656	5.31105	8.40285
4.82059	2.65038	2.90478	3.05753	2.33002	2.76392	3.76439	3.88316	5.33559	3.95334	1.99626	4.68148	2.5582	6.09219	1.91798	4.34505	5.29439
3.10001	4.48094	3.23981	4.25908	2.03828	3.70642	6.6458	3.32776	7.04125	4.1486	2.14367	5.03757	2.10884	4.03242	2.33073	4.63866	9.92963
2.75241	3.19892	2.19938	4.28262	1.73945	2.56072	4.85192	4.06295	4.76723	5.00647	2.19164	5.56239	5.7959	4.68522	3.40367	3.85642	5.98667
2.76671	4.68176	2.17673	4.67626	2.55588	2.81543	3.38294	3.05879	3.20086	4.97389	1.98506	4.91608	6.94868	4.6504	3.38671	3.49559	12.0716
2.69353	3.13607	1.7506	3.58911	1.77264	2.87345	6.38339	2.97926	5.45747	4.02501	5.39081	4.51247	7.1142	4.27517	3.51504	4.94564	3.60179
3.2959	3.30962	3.65642	4.4837	1.78421	3.42137	2.8786	4.17715	4.24756	3.65448	7.64623	7.74875	7.53447	4.51299	7.05067	4.59269	9.68408
3.97252	3.37847	3.82411	3.58886	1.96153	3.0044	4.36738	3.36378	6.7691	3.43302	4.0149	5.20344	1.49527	4.17372	2.83948	4.89461	10.2854
3.37649	3.63975	2.11185	3.39115	1.53449	2.91118	5.18062	4.02898	5.45167	4.12399	1.67787	5.02335	4.90452	4.60079	3.36167	5.0922	5.32132
2.53662	3.49893	2.69333	2.91091	1.48342	3.06985	8.04451	2.78317	2.68375	4.58395	3.64072	4.92538	2.94481	4.89714	2.38395	4.53788	4.11429
2.70927	3.65034	2.90105	2.9937	2.03691	4.02881	4.00205	3.82147	2.63894	5.20219	2.12575	4.06914	2.7125	4.67208	7.67321	5.31439	4.19807
3.93571	2.71448	1.73844	4.45772	2.5695	4.41179	3.87888	3.30096	6.14995	5.55433	2.602	4.79775	2.3077	5.79896	4.933	4.18962	6.61808
2.67433	3.58094	2.13867	3.81472	1.77619	3.27495	10.278	3.97072	6.89207	5.5702	3.71665	4.82791	2.30162	3.61566	12.7202	4.25323	9.03391
2.77403	3.70963	2.08974	3.16835	1.74058	3.27845	6.65568	3.58811	3.31834	4.80784	2.29467	6.7186	2.62129	4.29058	9.68791	3.92154	1.75622
2.66436	2.96156	2.99362	4.1603	1.61155	2.72826	5.93085	3.83	1.57106	5.17712	2.08408	6.63109	2.65811	4.49725	10.937	3.9036	9.24682
3.17591	3.94149	1.53489	3.01446	2.2432	2.52736	2.34327	3.3747	5.41255	6.23142	2.23932	4.95614	2.17677	3.40338	2.72047	6.03448	10.8428
3.15208	3.09198	2.14358	3.01965	2.31684	3.48774	5.4216	5.10232	1.82273	5.15623	2.33101	6.97234	2.73336	6.76242	1.96518	4.27283	2.40933
2.71357	4.29476	3.97176	2.32058	1.84125	2.96632	3.24035	2.7269	5.61176	4.49672	4.45824	4.01121	9.01535	5.70202	7.60565	4.79939	9.17747
3.72542	3.30635	3.50189	3.19116	1.77452	3.3036	8.87399	3.34476	4.69678	5.92026	3.29891	6.87603	5.08368	4.51356	2.62715	5.24476	3.14402
3.49091	4.21043	1.51502	2.89107	1.51562	2.57913	5.64641	2.95409	8.12872	5.41358	2.58178	5.37214	2.52886	5.031	9.85634	4.11609	6.93289
2.55672	3.53534	2.36279	2.50592	2.32244	3.21292	6.35381	4.00938	5.2011	4.98177	2.86326	5.27523	2.3024	6.54287	6.60093	4.8597	9.28409
2.67638	3.27502	2.87927	3.4642	1.2704	3.04883	1.76558	3.57818	4.99941	4.39962	2.61338	4.48719	2.71312	4.37857	5.66741	5.39586	6.107
4.2238	2.42867	3.63808	2.61944	1.69454	3.58926	2.03707	3.49978	4.77757	5.12592	2.06361	4.15616	2.97799	6.20665	1.93161	4.95086	4.49169
2.56738	2.64199	2.4382	4.11393	2.09014	3.49668	5.4455	4.33871	1.21498	3.8048	1.72305	3.59603	3.53107	4.80405	8.62234	3.86555	4.81778
1.77533	3.9381	1.83188	3.48499	2.87289	3.07582	6.46458	3.78605	3.88152	4.87881	2.43539	4.67264	2.61485	6.22075	3.76573	5.01809	5.73976
1.88025	3.78943	2.12859	2.83999	1.97459	3.1356	2.68145	3.13266	3.58127	4.71906	2.09998	5.15872	2.71218	4.46933	2.74715	3.53008	5.71392
2.31516	4.05458	2.75608	4.03447	2.52238	3.39169	6.33627	3.43694	9.03203	5.69367	2.54467	5.10492	2.63872	4.43598	1.78361	3.54109	9.42798
2.57878	3.04469	3.19704	2.99464	1.85212	3.5251	4.43857	3.28254	4.19565	4.69386	2.01669	5.35692	3.14136	4.79184	7.20514	4.42741	5.68447
2.44065	3.2842	2.2326	3.32655	1.88025	2.68075	2.64334	4.05527	5.58906	5.97453	4.05296	4.62855	3.46632	3.79714	3.10955	4.64576	2.98018
1.52522	2.47995	3.25345	3.53244	2.26809	4.25444	6.87461	3.62727	6.70992	5.24408	3.39627	5.00535	2.12735	3.03453	8.98629	4.05629	10.224
1.98867	3.50456	2.47004	3.26337	1.74304	3.62757	4.2798	3.53016	1.14561	4.55353	2.24461	3.87156	4.20093	4.59946	3.25667	4.42184	5.99037
2.04554	3.11712	4.06256	4.23933	1.64739	4.45816	6.65303	4.26605	5.96617	5.48962	2.28809	4.89806	3.92041	5.88934	6.96144	4.49815	9.16309
2.0184	3.11642	2.30879	3.27482	1.52821	3.46744	3.36963	3.11827	3.0475	4.90828	2.44778	6.88202	3.72909	5.98046	5.91665	3.71202	9.41406
2.55032	4.04923	1.83353	2.63289	2.06955	3.7017	5.19163	2.49466	3.4478	6.56767	2.07872	4.80896	1.83673	4.79147	6.17415	5.79248	8.34353
1.81763	4.10428	2.07767	2.63396	2.20145	4.15582	3.94539	3.07848	7.42254	4.51116	2.51428	6.66845	2.15479	6.78539	5.00564	5.95799	6.81569
2.15218	5.11112	2.29536	3.27192	1.59288	2.87231	5.37866	3.77759	1.7378	5.00904	2.00487	6.09206	3.04401	3.39957	3.21545	4.68071	1.86609
1.9087	2.96288	3.21208	3.09806	1.37011	5.01196	6.83346	3.57001	8.03603	5.7023	2.25957	5.34407	1.12689	5.3902	8.90388	4.63127	8.80731
2.11807	2.74986	1.71488	3.00079	2.0882	4.01117	1.23301	3.29673	4.16052	7.10178	2.56262	6.53865	4.67681	3.15105	1.32171	4.67154	9.4484
1.91645	3.85033	3.18835	3.29233	1.88723	5.69079	4.28015	3.28859	5.99706	4.42241	4.82152	6.22008	4.3683	5.14189	1.57174	5.44257	11.7871
2.2501	2.82753	3.43545	3.841	2.12244	2.77096	7.42823	3.51436	7.11397	5.41218	1.87128	4.87272	2.41788	4.42002	3.24284	4.03276	6.93464
2.26281	2.67685	1.88902	3.53442	1.89088	3.26924	8.96112	3.19376	7.76454	5.78238	2.02828	4.91066	4.92511	5.54366	2.19488	5.48851	3.76852
2.81653	3.92189	1.99077	3.38826	2.29596	4.23295	6.28644	2.6537	6.61407	5.01455	2.0211	5.2807	2.3044	5.36143	1.98264	4.34995	10.4889
4.58364	2.81328	4.06003	2.67512	1.98001	3.16909	8.42747	2.59415	2.51428	5.58945	2.07748	6.2269	2.24779	5.98742	2.16829	4.85009	6.5971
2.52302	2.70026	3.54606	3.49983	2.17566	3.36759	6.27567	3.57229	3.83312	4.50622	2.19689	4.89835	3.76591	4.14346	2.43349	5.29094	10.323
2.23687	3.28323	2.13937	3.23216	2.72845	3.40468	4.24338	3.32005	3.47989	5.13685	3.35456	5.60147	2.92738	4.84099	1.74575	2.72328	3.7439
1.805	3.50254	3.01208	4.04878	1.65965	3.35262	5.31808	3.56624	3.81501	4.64585	1.90753	5.25379	3.05877	4.53758	7.96943	5.35286	3.93606
2.09274	3.68646	3.43669	3.03344	3.13879	2.94303	6.02566	3.377	1.94751	5.13203	3.00821	5.15476	5.26591	4.97282	2.81929	5.74857	12.7836
1.99931	3.1119	1.94158	3.15302	2.39229	3.12238	3.196	3.05224	8.05692	4.69102	3.81131	4.64076	3.72447	4.03888	2.68056	3.31966	6.59434
2.13164	3.20504	2.53006	4.66193	1.71874	3.76121	4.66408	3.63964	4.4918	6.59704	2.75508	5.44546	4.33322	4.14869	4.97547	4.32179	3.90542
2.57384	3.75233	1.84272	2.9206	2.18173	3.06279	1.45464	3.66149	5.62649	3.92553	2.69306	4.91545	2.84853	4.79374	3.42708	6.50656	3.09092
2.81899	3.09861	1.41272	2.9961	3.28027	2.88583	6.58711	3.54097	7.42622	4.40865	2.77299	4.99108	4.93261	4.51647	8.04531	5.22445	2.0021
1.6661	3.43058	2.27701	4.45163	1.28279	3.83365	6.15526	3.70052	4.44679	5.34895	4.25803	5.22649	3.65528	4.40343	7.60721	4.78316	3.43202
1.9122	3.1913	2.00692	3.29621	2.10978	3.29725	8.36228	3.23733	4.68192	4.6909	2.41116	7.59024	5.98235	6.18513	6.85309	5.04738	10.472
1.90516	2.67373	1.99614	4.63177	2.44252	2.87583	1.75338	3.39609	3.37005	4.05798	2.91187	5.20139	4.4072	4.71318	1.75696	4.26428	4.13513
1.8756	2.61086	2.60984	3.52679	1.22754	2.62511	3.93847	3.9209	4.02059	4.37817	2.8233	4.54021	3.16246	5.34501	9.65619	3.7362	8.2806
1.85976	3.8121	1.47955	3.07351	2.04084	3.72825	4.44095	3.49879	3.95517	5.35859	2.90757	4.4715	8.72155	4.2468	9.0989	5.04428	4.92494
2.67028	3.50388	3.25579	2.64436	2.09938	3.30301	1.19593	3.09191	3.76458	3.90382	3.16684	4.44458	3.04762	3.94883	2.02819	5.8408	2.23349
2.09308	3.93227	1.61433	2.99231	2.61852	2.42598	7.92356	3.74387	5.75064	4.55025	1.94632	5.95339	5.17319	7.38411	6.05752	5.5524	6.79646
2.22808	3.1545	1.56955	3.2067	2.67591	3.19898	3.5433	3.21761	6.92807	3.58237	3.0528	5.45666	3.35258	5.72847	2.39061	3.86601	11.0143
2.27481	3.72029	2.40337	3.59061	2.07692	3.91177	1.54961	3.33349	3.49635	4.27017	2.88222	6.08294	3.38732	4.80483	10.3573	4.72256	5.11795
2.66349	3.03394	3.78265	3.51753	2.8433	3.12604	6.58123	3.97525	5.58659	5.63719	6.23218	6.54967	2.84426	3.6882	2.38742	5.64985	3.20378
1.63256	3.77392	3.2869	2.94976	1.90951	3.6759	4.23223	3.88504	1.54289	4.69192	1.55858	6.57897	10.6885	4.57989	6.60169	3.72804	4.08724
1.77651	3.71099	2.39457	3.36214	1.70795	3.34248	6.3647	3.17889	4.40751	4.49566	2.55754	4.90445	4.04978	4.39497	8.79311	4.46876	4.63689
2.18449	3.31552	2.46654	2.85501	1.75484	3.28886	4.06741	3.41238	5.36524	4.92687	3.04714	5.23705	3.82006	5.25852	2.53962	3.99585	8.26538
1.96913	4.19945	2.06453	3.64812	2.28043	4.45427	4.98809	3.72203	3.76001	4.40167	2.66054	5.49329	3.60298	5.03964	5.86206	4.70799	4.44255
2.06662	3.11089	1.93478	4.03826	1.39943	2.8022	5.64058	3.49151	6.0019	4.72411	2.53004	5.72674	2.57381	5.71602	2.8538	5.87356	5.36968
1.81382	2.84455	3.41199	3.16315	1.98827	3.04908	6.29493	2.9385	7.70382	4.7123	2.41889	5.68072	2.3847	4.77408	4.06207	4.52421	3.52157
1.99953	3.95815	4.37463	3.30851	2.28899	2.80165	2.16801	3.20644	5.60507	3.95862	4.22316	5.22042	5.12981	4.58622	8.5197	5.23689	5.53293
2.47664	3.58282	3.15183	2.6078	1.92597	4.37689	5.37238	3.86333	7.57313	5.24989	3.15361	5.62314	6.10628	4.95658	5.80179	4.66603	4.8294
1.92279	3.83229	2.17446	2.91168	3.28154	3.74656	2.43124	3.18955	1.94027	3.98715	3.11833	6.01723	14.051	4.30818	5.67977	4.44227	8.80211
2.01054	3.18982	3.20812	3.54424	1.86761	3.6272	6.93188	3.03977	3.67733	5.87285	14.7734	5.31349	5.80226	3.91639	1.96073	4.73126	1.34626
2.09063	3.21103	2.51635	3.92916	2.1847	3.25347	1.89772	4.01051	3.89781	5.49167	1.90997	5.54217	7.2562	6.14605	2.8113	3.93271	3.0423
3.91823	3.19739	2.77786	4.13309	2.19022	3.09297	6.15161	3.91371	6.49189	3.44185	2.75909	5.92128	1.78545	4.7276	2.2999	6.11147	5.34027
1.60588	3.71369	1.91347	3.60029	2.95629	3.68825	5.3159	3.61293	5.72638	4.20184	5.60956	5.56523	2.54189	4.18381	2.04064	6.32796	4.02582
2.33515	4.55805	2.28525	3.00956	1.394	3.31518	5.33183	3.25682	4.3649	4.83627	1.76685	5.33476	1.96882	3.82252	1.54228	3.59877	9.25708
1.31835	3.14865	2.10037	3.88677	2.06248	2.52151	5.44576	3.46249	6.64889	4.74798	1.34558	5.71731	2.22681	6.23124	1.78346	4.46443	2.43827
1.97697	2.78856	2.70921	4.13748	2.56244	3.29064	5.10172	3.14284	5.3051	6.27285	1.67908	4.44154	2.82458	4.60999	1.78799	5.26107	8.85427
2.43307	3.79369	1.65515	4.21496	2.8236	3.31609	6.2058	3.81399	7.05966	4.40693	2.42543	6.26428	2.90679	4.03983	7.72837	4.6067	3.0538
1.83204	4.45816	1.49452	3.1735	2.85676	3.4218	6.78114	3.45696	5.50399	4.41275	2.71919	4.93328	5.7228	5.08342	4.9514	5.182	8.72403
1.96002	3.74844	2.65931	3.45327	1.56009	3.60053	4.67926	2.78908	7.15927	5.7891	2.47135	5.68017	8.65836	5.12403	4.88096	6.20771	9.51056
1.8302	2.81822	1.95448	3.11172	2.31107	3.27889	4.22537	3.14323	8.18814	4.05239	4.43577	4.91108	2.94171	5.50849	8.71665	5.08868	3.2207
2.40764	3.19801	1.81038	4.37125	1.94021	3.67398	6.29758	2.85022	7.79925	6.90146	2.46037	4.2207	2.98938	3.8156	1.6643	4.52082	7.03092
2.3967	3.74659	1.54836	3.1098	2.75815	2.96252	3.51976	3.32255	3.42541	4.7311	2.59701	4.91412	8.23523	3.43043	2.36437	5.57315	6.39844
2.39092	3.15297	2.58272	3.69996	1.8157	4.22023	3.08853	3.7931	3.42222	5.07297	2.85088	4.35441	3.36007	5.63282	3.94888	4.56711	5.81196
1.50073	2.64247	2.0359	3.38117	2.38972	3.41751	6.0902	3.85295	6.23349	4.36763	1.20939	4.33297	5.60009	4.99444	4.20253	4.32727	9.36544
2.35706	4.29385	2.96993	3.9261	1.80522	2.95142	4.04788	3.32424	3.66883	5.56822	3.35453	5.35115	4.1091	4.16328	4.12338	4.73526	7.38584
1.74336	3.07503	1.91253	2.83438	1.8115	3.75342	7.23787	3.08405	5.60339	5.72841	3.0888	5.40051	5.87611	4.45956	6.04137	5.96233	11.7691
2.14328	3.6912	2.51421	2.65177	2.34666	2.81864	3.86707	3.68082	5.38949	4.40853	3.09382	5.95858	1.90719	4.34258	7.02648	4.93525	8.66589
1.76648	3.66072	2.36915	3.49314	1.68736	3.52467	2.68058	2.82641	4.62028	4.20259	3.92054	5.7926	1.75771	4.98011	2.24976	4.45581	8.32699
2.15689	3.83943	2.89334	3.50923	1.93254	3.2153	5.89194	3.64469	3.65035	3.8798	1.96898	6.09686	2.30139	4.6367	5.21846	4.6896	2.35222
1.85196	4.02622	2.38868	4.13486	1.79238	3.76902	5.54539	3.05753	5.18262	3.55235	2.99961	5.01334	1.98325	5.01458	9.67483	4.4912	5.05726
2.64962	2.97921	2.88612	3.04738	2.25559	3.58964	4.87579	3.96997	6.47855	5.31979	1.67917	4.445	2.31889	4.94548	5.65732	4.0129	8.28355
1.9744	2.82329	1.88259	3.62774	2.4008	2.53189	3.05327	3.48366	5.4518	4.2228	1.87419	4.80648	2.21514	3.81606	1.55502	5.269	6.79388
2.10141	2.66036	2.82938	3.60219	3.31631	2.61214	5.73507	3.63553	3.96923	4.90998	1.63064	5.88631	4.8863	5.82714	3.93474	3.87596	8.44194
2.54518	2.75544	1.59281	2.84714	2.61034	3.56869	3.5685	2.67991	1.67705	4.48992	1.35583	5.85504	8.31238	4.56291	1.87892	4.95429	7.79489
2.12123	4.14218	2.41213	4.59845	1.96576	2.96635	6.35183	2.97867	1.786	5.1199	3.20126	5.81927	4.44618	4.60605	2.69878	6.84346	2.0727
2.8523	3.43783	1.92173	2.90499	2.38331	3.0956	3.0559	3.46315	5.50621	4.89378	3.98487	6.42588	2.21857	4.72083	2.18212	5.11559	6.37862
2.08057	3.12104	2.26235	3.07908	1.87481	4.15516	7.54476	2.4426	5.13105	4.11559	2.21878	5.48459	2.68845	4.38004	4.261	5.48573	8.2247
2.78729	3.86335	2.19132	3.2517	1.89307	3.28405	8.72142	3.19644	8.68166	4.15797	3.69115	4.94737	3.28029	4.37944	3.22916	5.17688	11.3698
1.70991	2.52596	2.06373	2.62598	2.19377	4.64303	5.01595	2.85228	5.12443	4.03737	3.15348	5.94463	5.66817	5.50559	9.11973	4.58846	7.44588
1.79195	2.91272	3.578	3.27716	1.87619	3.3835	3.1986	3.53099	4.90315	4.37672	2.8546	4.82141	4.27548	4.07388	3.13828	6.38168	5.54838
2.56503	2.94077	2.00753	2.94859	1.92992	3.19871	7.83099	3.95182	1.17247	4.57064	2.67976	3.91226	2.65729	4.29861	6.51815	3.53899	9.14161
2.23547	3.69521	2.17972	2.56885	2.2353	2.98258	4.35778	3.65351	8.50635	5.53463	2.38953	4.87918	2.95553	4.41986	2.2617	4.50471	7.06197
1.81391	3.97426	1.53578	4.2714	1.88727	3.36377	3.91436	2.62089	2.52448	5.61011	6.57532	5.00378	5.58767	3.9228	8.59971	5.39351	10.9388
1.86683	3.17604	2.07756	3.85157	2.34115	2.8809	3.22484	3.21859	5.25631	3.54602	3.07505	6.01824	3.1867	4.2131	5.59352	4.30675	5.59773
1.65775	4.67399	1.36622	2.76438	1.68751	2.84535	7.94354	3.85393	5.33334	4.48851	2.42271	5.69802	2.75692	5.53887	4.07589	4.72013	1.72555
1.91042	2.74879	3.98335	3.24136	1.74721	3.22676	5.66305	3.084	2.56766	3.83146	12.8989	6.58988	1.77021	4.46298	8.95645	4.72216	4.78909
2.36319	3.27211	1.91492	2.71475	1.67735	3.69858	1.4757	3.80013	1.25996	4.83721	1.57624	4.83527	2.5388	5.19975	1.6037	4.9882	3.47293
2.20345	2.63159	4.02388	2.62695	2.65901	3.75128	4.74753	3.555	4.79479	5.08152	3.177	5.13413	2.06231	4.53084	8.51698	4.7587	6.8076
2.48731	2.89505	3.35732	3.15297	1.48777	3.89735	8.26348	2.56723	7.97104	5.23704	14.6115	4.69733	6.06005	5.56273	1.91234	3.81252	7.54196
1.7847	3.53218	1.31658	3.81117	2.19424	2.91201	2.6855	3.6988	4.98813	6.03625	2.60473	4.60992	2.03571	4.94069	2.73665	3.96563	1.75933
2.2045	3.6057	1.87319	3.83079	2.90382	4.09131	4.35426	3.32911	4.76428	4.56338	2.50119	4.13634	3.68893	5.71887	12.2013	4.09373	8.49652
2.41958	4.65755	2.72719	3.28536	2.70988	4.59135	5.11666	4.01004	7.64551	5.55504	3.09853	6.76788	2.66561	5.26614	1.96189	5.66182	12.0699
2.7683	3.82646	1.7832	3.4847	2.04421	4.05108	3.98163	3.53132	5.55029	4.78796	1.96836	4.42293	2.48957	3.86409	4.44523	5.30358	12.6496
2.40467	3.52614	2.53592	3.048	1.73689	4.44725	3.93533	3.1697	8.61459	4.94695	2.18338	6.17142	6.84573	3.97778	2.28281	4.79693	7.62634
1.76978	3.4843	1.77121	2.50848	1.80976	3.74081	4.62076	3.73327	4.58343	4.59472	2.20686	4.50663	1.98203	3.3711	6.32016	6.26994	1.98321
2.06817	3.0399	1.55314	2.88619	1.44068	2.78284	4.00852	3.46588	4.70772	6.70512	1.6863	4.78939	2.47008	5.46426	6.89174	3.36911	6.11048
1.80203	2.96961	2.92676	4.05739	1.87739	3.78337	5.73151	4.561	3.32277	3.53109	5.63077	5.73937	7.76061	4.36682	2.10475	5.01976	2.92614
3.18654	3.49217	2.39371	3.72503	2.06327	3.94088	4.23261	2.84102	10.2694	4.17937	3.87679	5.95977	3.20948	4.74917	8.09309	4.49736	7.71526
2.48242	3.2665	2.04888	3.52691	2.46227	3.13546	1.51514	3.53933	3.7345	4.4622	3.03232	5.42866	10.3758	4.93997	9.7416	4.6052	3.38467
1.81465	2.77127	3.33381	2.80504	2.2347	3.7094	5.77115	3.39292	3.90987	4.91315	1.31501	5.13666	2.12215	6.29949	1.95976	5.66419	9.26413
1.67138	3.38361	3.03074	2.71149	2.60222	3.36005	4.49182	3.51867	6.57275	4.64142	1.90777	6.34038	2.58433	4.59252	8.05068	3.90825	6.50417
1.81023	2.97943	2.47778	3.02565	1.92844	3.40899	4.51591	3.66103	4.97227	3.76372	1.35623	4.99775	3.40413	3.38338	6.79357	5.11487	2.35991
2.24934	2.94582	1.50571	2.13487	1.59916	2.64723	1.99033	2.63248	2.44338	4.17163	3.31184	4.64925	7.07949	5.38603	7.27579	5.21541	2.21008
2.23704	3.51221	1.74363	3.0513	1.81128	3.17403	5.58773	5.05526	7.15815	5.81583	2.79922	5.32958	3.07492	3.73662	3.24612	3.86411	9.57316
1.9246	3.53039	2.66316	3.16225	1.88819	3.68011	3.82695	3.73891	6.78129	4.47755	3.44765	5.07303	2.65812	3.6161	1.15669	4.51521	8.24367
1.88105	2.7328	1.65175	3.66082	1.72341	4.16317	6.57542	2.78663	3.82609	5.5752	2.14542	5.19269	1.74644	5.66394	2.40702	3.51699	7.47987
2.16238	4.71666	2.38779	4.03136	1.39304	3.70741	2.41575	2.95569	3.96835	5.14119	2.7087	3.85107	1.94654	5.43901	2.38628	4.707	4.35448
2.24872	2.94216	2.54309	4.30893	2.72004	3.59266	4.29931	2.75358	6.89898	4.27165	9.62168	5.49123	6.43043	5.7659	3.55963	4.94547	7.5333
3.0522	3.06547	3.22801	2.79955	1.31975	2.85004	1.50805	2.65212	5.38274	5.65686	2.14	5.11139	7.62123	4.10932	4.18091	5.26425	6.6083
2.83229	2.79502	2.763	2.9772	2.30354	3.38731	5.53965	2.81143	4.37105	5.11716	2.54246	5.68958	7.91135	4.58977	5.42535	4.70894	4.43499
2.28918	3.03462	1.91036	3.3009	1.822	2.75247	6.6131	3.45097	9.05325	4.77333	3.13905	5.93641	2.45483	5.07386	3.55379	4.12561	4.7659
2.31225	3.04012	2.65171	3.14132	2.50919	3.35161	1.77199	3.27836	8.84745	6.09544	2.16985	3.63095	4.24378	3.03764	8.94939	4.42621	10.3799
2.19321	3.2815	1.89011	3.12111	2.46877	4.20284	2.06103	3.18179	5.59315	3.92931	2.86388	3.7915	2.71378	6.19626	8.25643	4.81335	2.83105
1.9083	3.69317	1.74019	3.83215	1.22527	3.90205	4.9083	3.80827	1.31741	5.13285	2.22884	5.62794	2.78387	1.47844	2.71288	2.84712	8.19559
1.73079	3.22012	2.06237	2.77475	1.78296	2.99077	5.25791	4.0672	4.2073	3.93269	3.41933	6.10766	3.42605	5.1359	2.62955	5.02311	2.14714
1.81737	3.60917	3.1746	4.66789	2.18259	2.86322	5.79256	3.54371	4.34931	5.4744	2.06812	5.19031	2.45676	5.02416	7.05081	4.17614	6.51175
2.19601	4.37226	1.94826	2.95525	2.07387	2.99062	1.6319	2.92205	5.81924	5.68739	6.40711	5.50798	16.2207	4.52569	6.09656	4.98849	9.03703
2.03314	3.2633	1.80464	3.12035	1.44496	2.66538	4.20806	3.42672	2.59128	4.65893	1.67815	5.32827	7.26244	4.01901	1.92459	4.30253	6.01851
2.21197	2.85731	2.6631	2.71837	1.4009	2.95584	8.26149	3.7597	4.38057	5.09589	2.25525	4.57503	3.25495	4.47043	7.52528	5.45364	9.62434
2.28646	3.73958	2.83391	4.23602	2.04227	3.85258	6.30204	4.02835	1.00472	4.90195	5.67083	4.743	2.10182	5.01414	3.04225	5.96067	8.28825
2.09454	4.12849	2.92629	3.47165	3.09172	2.5859	1.43579	3.48796	4.94864	4.40062	1.76996	4.91834	2.55612	3.42562	4.92525	4.40035	11.0057
2.43253	3.31221	2.22796	3.7303	2.45756	2.678	7.4875	3.14351	5.83164	5.02987	7.48509	4.30216	2.99295	4.60676	2.61109	4.72509	9.02046
2.10642	3.1013	1.76959	2.98065	1.61569	3.37645	1.17933	3.30064	6.02692	5.57846	3.30022	6.14718	3.2989	3.58015	8.89717	3.51762	8.29778
1.7789	3.14986	2.06556	3.63771	1.94402	3.59481	4.48554	2.43998	7.91929	4.18024	4.03465	5.8065	4.08117	4.21669	9.16371	5.27007	4.98525
2.74031	2.93601	3.09653	3.01498	1.75244	4.16298	7.29278	3.50279	3.7669	4.40558	1.8444	4.76551	4.01812	5.06753	2.18815	4.38275	5.53004
1.83828	3.15789	2.86832	2.73472	1.391	2.71068	1.38071	2.93671	6.19148	6.24258	2.06823	6.03175	3.01014	5.44567	2.93984	4.32946	3.67943
1.89892	3.19634	1.96571	3.69722	2.5201	3.53114	5.15724	3.96039	5.59333	3.69658	4.21374	4.79528	1.42113	5.00616	2.75893	4.456	2.38858
1.80486	3.95972	1.98835	3.22767	2.27397	3.43355	5.21166	3.39362	1.57169	4.26872	2.87088	6.08914	3.24593	4.79409	10.8678	4.73743	8.58725
2.63006	2.5665	2.79817	2.99751	1.98887	3.3747	3.6443	3.49415	6.2326	4.9162	1.22453	4.89511	3.25507	4.33589	6.27726	4.46953	8.93988
2.18975	2.79467	2.59991	2.5743	1.94619	4.85348	4.2515	3.40441	8.89543	4.59244	2.0827	5.26946	1.55067	4.14278	1.83315	4.62568	7.78287
2.55941	3.55258	2.20916	3.40865	2.19299	4.07431	4.48061	2.9896	1.39797	5.09417	2.94263	6.25982	2.22463	4.58565	1.72113	4.30205	10.8175
1.89576	4.0804	1.90703	3.08945	2.43812	4.55539	5.42661	3.78643	5.92323	5.32021	3.30187	4.55491	5.85764	4.68393	9.26922	4.18406	3.58907
2.31503	4.03134	1.75813	3.44488	2.38841	3.90316	8.3714	3.56923	4.05323	4.45094	3.9423	5.27289	1.55681	4.25897	8.24684	4.17849	5.6965
2.01779	2.89212	1.92919	3.26733	2.26228	3.65711	1.57162	3.69147	5.66921	4.04989	3.98866	5.10234	1.76849	5.74838	5.9498	3.26833	4.44458
2.02798	2.77958	2.92642	2.90354	2.12152	2.57187	7.96085	4.09523	5.4861	6.19995	3.4755	4.57016	2.53039	3.75695	1.6021	4.62256	5.01843
2.68483	3.66053	2.11157	3.89909	1.93407	2.50762	8.07086	3.42249	6.70048	4.51754	5.63883	5.20896	2.2608	4.24314	3.36605	4.52898	8.72465
2.60514	2.93003	1.95212	3.96575	2.1307	3.10827	3.30266	3.53516	2.09019	3.64351	3.25317	5.61331	3.47409	4.50627	6.74364	4.96764	10.1053
3.08197	3.31274	2.08319	3.42884	1.97048	3.01397	5.63211	3.76798	3.40087	3.80139	5.6148	4.06001	1.84016	4.5765	1.30365	4.06803	1.44635
1.81346	3.52298	2.01584	3.71604	1.72488	3.0748	8.60962	3.19551	6.79271	5.41469	3.5377	4.41137	1.88248	5.013	11.8323	3.62276	8.95541
2.74171	4.07244	2.55965	3.41666	1.90102	2.66069	4.69376	3.35903	5.02218	4.88296	2.42218	4.59396	2.02216	4.82437	6.60952	5.24731	11.0243
1.59951	3.72484	1.98665	3.91016	1.69374	2.77568	2.95142	2.61905	2.07169	6.09403	2.20073	4.58024	1.5601	5.47233	3.72602	5.54488	2.5411
2.30561	2.79621	1.69714	2.98728	1.84445	2.28325	8.2412	2.52064	7.26864	5.66836	3.24489	6.14173	2.29146	3.21398	8.49869	4.5164	3.52045
1.86538	3.32196	2.20932	3.05731	1.69858	2.97639	5.90327	2.60315	4.34452	5.06558	2.50236	4.71937	1.69578	5.43372	1.88919	6.14144	3.94901
2.01249	3.03963	1.76188	3.38588	1.75532	2.66919	5.05609	4.08266	6.20956	3.93315	5.58581	6.50073	1.78847	4.27238	11.0851	3.88563	2.44366
2.55387	2.76858	2.76602	4.1359	2.4381	2.67692	6.25174	3.40188	4.99841	4.88104	2.11303	4.80933	1.9646	4.91236	8.16945	5.498	8.04303
1.97196	3.29685	2.89006	3.32116	1.85367	2.19198	8.68175	3.2981	3.53386	6.49464	3.00115	4.99106	2.3422	5.82219	3.94787	5.18558	5.08966
2.12173	3.82128	2.92727	3.70009	2.19202	2.7923	5.05094	3.689	4.93652	4.73302	9.1371	7.28739	4.59551	4.58866	6.74199	3.51418	5.12083
2.04285	3.32886	2.41091	3.81286	2.02702	2.94979	1.92614	3.20039	2.30154	4.69732	3.21332	6.12714	4.33985	4.21282	4.54788	7.33186	7.72042
2.63393	3.51079	1.69559	3.82162	2.31935	2.94302	4.67528	3.26754	7.57739	5.66893	2.04796	4.72731	4.40118	4.11918	6.41573	3.36759	7.70135
2.84034	3.41341	3.81064	3.92888	2.75903	3.47338	5.30445	2.66156	1.22051	4.99181	1.61816	5.32782	2.56149	3.84513	1.87399	4.15144	4.18977
1.85567	3.39813	2.03935	4.8768	1.92412	3.37013	8.13879	3.5541	6.53194	4.11024	2.9604	5.79444	4.23082	4.17743	3.31673	5.10998	4.11633
4.16827	3.47719	2.72006	2.84557	1.72913	3.0364	4.6858	3.83489	6.77183	4.82693	2.70921	4.69198	3.00726	4.48596	2.15267	4.97714	5.39597
1.93964	3.27867	2.52899	3.22482	2.39539	2.68673	6.28141	3.50764	1.31187	6.84537	4.92253	4.89083	6.67492	5.02594	5.70887	4.56714	7.85823
1.87249	3.67488	1.52905	3.62336	1.52419	2.60704	7.51343	3.8422	8.125	5.46704	1.97969	4.67715	2.99465	5.7055	7.04676	3.52825	10.6585
1.77885	4.13493	3.36316	3.06548	2.47182	3.70174	3.18426	3.37457	5.93477	5.05441	2.30792	4.58787	2.50926	5.0061	5.77908	4.81975	2.73172
2.00686	3.66968	3.01418	3.57611	2.45711	2.51752	5.11928	3.40818	3.20999	5.16789	3.20222	5.48785	3.19325	4.40679	4.5954	5.53955	9.59422
2.29558	4.07353	2.47474	3.93325	1.46623	2.93154	5.58811	3.64447	4.3025	4.82341	1.45886	5.2249	2.94748	3.85767	5.96633	5.23455	12.4942
2.04237	3.27038	1.93989	3.85664	1.86056	4.14405	4.07508	3.97861	4.59662	4.70869	2.50767	4.99597	1.87918	3.82954	7.58159	5.63005	4.71669
2.89351	2.84189	2.79607	4.18551	2.53405	4.0043	6.22954	4.68749	4.28367	5.00391	3.84921	5.92782	3.20607	4.65414	3.68341	4.33767	3.58725
2.25597	4.09126	4.44112	3.71939	1.92198	3.37995	2.66814	3.50631	8.2803	4.15231	1.3914	4.75856	2.96275	5.19954	5.95239	5.64125	7.82824
2.51826	2.96812	1.74531	3.04003	3.36055	3.96208	4.82071	2.98085	2.40652	5.39895	2.90313	3.43304	2.44534	5.14595	7.14525	3.98744	9.17061
1.71578	2.64351	2.55678	2.96509	1.84477	3.41336	7.79201	3.06894	6.51519	6.21723	3.15119	3.86426	1.53457	4.27279	1.69854	5.0902	8.70444
2.00848	3.06699	1.71121	4.07867	2.10068	3.72245	2.19372	3.28365	8.41807	3.2122	1.68256	4.36596	1.65743	4.44119	4.5757	3.45169	2.22238
2.46957	2.55207	2.16853	3.86937	2.87839	3.12694	3.05457	3.65688	7.07	5.82427	1.49623	4.82582	3.04644	4.35032	4.88241	4.8925	6.63377
2.11074	2.61377	3.48996	4.37333	1.49255	2.83894	4.82228	4.48654	5.75451	4.60503	2.28532	5.05737	4.89974	4.71755	5.92245	4.72171	8.22367
2.45257	2.89107	1.94768	3.42126	2.23314	3.11264	5.15272	2.51802	5.64353	5.9688	2.76952	5.18021	6.62443	4.04657	3.39555	3.73097	7.92633
1.772	2.89767	2.08087	4.32762	1.64717	3.49372	5.07541	2.97716	4.49256	5.94881	2.75617	4.61573	7.02619	3.80932	10.4629	6.34703	4.17771
2.56459	3.1196	2.07855	3.21373	2.07411	2.93718	6.77594	2.81733	4.46597	4.00819	1.90312	5.1011	1.93285	4.7691	2.60741	4.08057	9.18762
1.79302	3.41798	1.68882	3.17613	2.82042	3.67107	3.02316	3.36263	4.8186	5.98739	3.14616	5.38156	2.21592	4.28743	3.45886	5.25098	10.4834
2.50369	2.64654	1.79358	2.58657	1.95546	3.63378	5.25181	2.97009	0.936576	6.47981	3.14335	4.39366	2.60178	4.68741	2.86627	4.19663	2.35693
1.99144	3.36608	2.07505	3.15941	2.50635	2.75805	6.83599	3.02258	8.72868	4.67908	2.78167	4.54695	1.74713	3.65743	4.45759	4.48224	9.36545
1.9835	4.56582	2.39045	4.7338	2.00082	2.87927	5.88127	3.07198	5.00924	5.40469	2.17889	4.45378	3.06657	4.90334	4.92962	4.39361	2.2834
2.39744	2.7549	2.37503	3.63817	2.08283	3.62051	1.46458	2.73415	8.65073	4.08082	2.84738	4.90697	2.41794	3.83839	9.28952	4.07095	5.8547
1.90568	3.3837	2.01659	3.69415	1.83112	3.09266	4.05377	2.83333	5.5918	6.4062	2.18565	4.40734	2.58517	5.9676	5.21037	4.43488	4.00672
1.59094	4.28663	2.10614	3.50922	3.10846	3.03279	4.20326	3.69087	7.98813	5.06924	2.57117	5.54137	2.37381	3.83051	3.73803	4.95099	2.42704
2.25674	3.38196	1.65352	2.96977	1.88679	4.43392	6.5093	2.93883	6.67445	5.6604	5.52874	5.49797	4.90847	5.92628	2.73413	3.54761	9.44809
2.53782	2.99589	4.5436	4.59072	1.45512	3.51926	7.16895	3.09477	4.61012	5.7694	3.85332	4.67843	7.92971	4.67195	2.55874	4.42045	5.44689
1.66133	3.98114	1.6622	2.95767	2.54056	4.36635	5.28282	3.2053	8.50094	4.69778	1.51006	6.13931	3.80091	4.77282	8.81595	4.29792	9.12988
1.94108	2.55743	2.36842	3.01467	2.14637	3.38213	5.4926	4.07282	6.78588	5.55911	2.94057	3.75823	2.21151	4.78484	3.06567	4.31632	8.76252
2.33834	3.69859	2.00573	2.64172	1.69999	3.20781	6.12488	3.64932	2.76791	5.81926	5.34061	6.25181	3.25766	5.13855	11.0968	4.61155	9.10508
1.6928	3.96894	2.46064	3.15904	2.31785	3.69252	2.94923	2.96996	5.16581	5.42193	2.85234	5.02496	1.44745	4.27225	2.12379	4.36549	2.32501
2.13192	3.71462	2.05794	3.30803	2.02526	3.51961	4.26596	3.26347	4.82001	4.15143	2.83726	4.97367	2.59777	4.87099	6.35067	4.15098	3.35606
2.18348	3.21482	1.93301	2.98309	2.60656	3.72638	3.48369	3.725	4.32689	4.49527	6.63112	5.81662	2.35492	4.55796	5.25375	5.05617	7.24773
1.88206	3.59056	2.89745	3.08311	2.08369	2.83623	4.98071	3.29044	1.97535	4.1736	3.38	5.77675	7.33969	6.34044	7.37906	3.58969	3.60631
2.10831	3.49403	2.67136	2.88471	2.15688	3.58858	6.49209	3.19568	6.5566	4.94214	3.82503	5.24785	2.29883	5.33842	8.29291	4.47529	4.38413
2.44436	4.21953	2.74727	3.95939	2.18529	3.74103	5.75991	3.08449	4.58328	4.35818	2.39914	3.80012	4.3406	2.75553	3.27798	4.56897	5.45217
2.61837	4.21192	2.1388	3.45831	2.50037	2.88404	4.45693	3.21027	5.01628	6.34629	7.34005	4.59818	4.25615	4.15364	9.73263	4.24343	4.92948
2.5095	3.51056	3.03459	3.44331	2.20452	3.29598	6.1173	2.78309	6.86214	3.29904	4.33845	5.37988	1.46081	5.24716	10.2817	3.24107	2.46257
2.34795	2.83592	2.6791	3.87437	2.93898	3.92311	3.49895	3.08248	6.23227	4.4586	5.30005	4.24444	2.23735	5.31428	5.00192	3.13346	9.43835
2.25321	3.62873	2.49423	3.39472	2.61053	3.93155	6.54883	3.15433	1.13672	4.61293	2.06382	4.73699	2.00826	5.59343	11.8994	1.56906	12.98
2.09854	2.86924	2.11826	3.73749	2.04247	3.04814	5.02581	3.43719	7.21358	5.09532	1.816	5.78632	3.83052	5.31631	1.22079	6.4082	7.81065
2.04852	2.64248	2.24405	2.73928	1.47195	3.58225	1.05012	3.20178	8.87547	4.88688	2.54551	4.5997	3.12551	5.16888	6.49519	4.30503	1.95771
1.80647	3.30709	2.8268	2.67163	2.14222	2.80927	7.27865	3.54984	5.61961	4.62064	5.25708	4.33201	2.81739	3.77436	4.89467	5.88314	4.73687
1.75907	3.76087	1.95031	3.44647	2.28598	3.39638	7.10008	3.18888	1.73014	4.70202	3.05596	7.14348	2.30572	4.44174	4.20066	2.78225	2.2262
2.33888	2.93048	1.81008	3.83914	1.92376	3.01429	4.04874	2.71259	5.3269	4.18423	4.39927	6.51777	4.5015	4.35372	7.3065	3.35902	3.92729
2.36417	4.09861	2.17204	4.14561	1.49121	3.36231	3.94197	3.79008	3.40024	6.02207	2.8728	6.07928	2.60655	3.71122	1.47042	5.74247	9.62418
1.99762	3.96952	3.43853	3.43651	1.69924	2.73317	6.30479	2.82303	7.70136	6.09933	3.68715	4.30149	3.4607	6.21109	8.19246	3.13734	7.17986
1.79107	3.39103	1.97024	2.75787	2.60372	2.86263	3.7479	3.03443	3.60021	5.27052	3.79415	5.36328	2.97639	4.42472	3.00379	2.97953	7.35467
1.98253	3.5178	1.80809	3.1153	1.79567	3.66422	5.33605	4.19424	8.62906	4.60308	3.61698	4.90216	3.3932	5.49906	10.3561	4.17811	11.4777
2.52426	3.22503	3.53999	3.50766	1.89489	3.1533	2.38812	3.30427	3.18979	4.78641	2.65185	6.34382	2.89602	3.72865	7.98872	3.49583	7.4065
2.02126	3.51708	2.03971	3.28453	2.01087	3.62187	7.14605	3.11581	7.82108	4.72018	2.89337	5.51011	3.11107	4.2725	2.56051	5.43872	9.50831
2.84062	2.64638	2.15081	3.2218	2.14526	2.75564	8.91083	3.03132	2.3503	3.81714	8.32721	5.47394	1.78318	4.8218	2.64011	2.90499	3.43087
2.16395	3.51656	1.5424	4.06556	1.76297	3.93108	3.05447	4.14074	3.22015	4.11238	1.34354	5.2435	1.82042	4.37046	5.55997	5.06211	3.70545
1.79347	4.63171	1.92697	2.85499	1.22137	2.9896	5.93446	3.07339	3.44293	4.26328	3.03482	4.68224	3.05151	5.18038	2.34683	3.72819	3.28067
1.761	3.6811	4.01501	4.07908	2.24465	3.81181	2.5295	3.3732	5.20695	4.08852	1.4508	5.54568	2.56326	4.68658	12.8701	3.04768	7.96658
2.16529	2.73241	2.287	3.99842	2.50775	3.61476	8.37378	4.68773	3.2769	5.73486	1.79461	4.26919	2.91527	4.87453	2.09264	5.42732	10.9398
2.14061	3.06676	2.07276	3.58691	2.07186	3.06188	3.99348	2.82409	7.72248	4.81913	2.10426	4.90674	4.99911	3.28993	9.37008	3.04753	11.3844
2.16631	2.97499	1.94325	3.32153	1.68004	3.43961	3.73924	3.71489	5.67854	5.57675	3.24693	6.08065	5.66225	3.71247	6.20894	3.468	5.88454
1.58642	3.17492	2.37432	3.2824	1.81779	4.61522	4.88637	3.81559	5.39713	4.08863	2.03826	4.63198	4.56497	5.20596	6.78992	5.61179	3.97797
2.56277	4.41469	2.71008	3.70926	2.55499	3.52945	2.02227	3.08549	5.38133	5.0671	3.90961	6.19378	1.93909	3.6656	2.53385	7.32916	8.60899
2.14048	3.8247	2.42746	3.68927	2.0775	3.85725	6.05165	2.83867	4.75812	6.64118	3.09379	5.6467	1.68755	4.4029	3.39206	5.39105	4.30307
1.96673	3.92364	1.79227	4.61574	2.51656	2.89206	4.33801	2.54437	5.14142	4.24058	4.49966	5.16936	8.35766	4.17488	8.43517	3.74405	5.30548
2.32878	3.03557	2.01338	3.78172	1.791	3.91125	6.98681	4.15328	6.65007	4.90248	2.97338	5.09931	3.35581	4.57889	3.29062	4.22749	8.79938
2.45854	2.66094	2.97636	3.80245	2.56791	3.22838	1.15184	3.37331	4.34827	4.52439	1.16343	4.75745	1.81492	4.2539	1.58325	5.14408	3.1504
2.02363	2.76199	3.905	3.20952	2.12697	3.1532	3.96678	2.51414	5.09539	3.74517	2.87058	4.80921	12.7415	3.699	9.28331	4.90564	3.11845
2.08815	3.48563	2.40136	3.87562	1.61217	2.92291	4.14937	3.73551	8.84683	5.66903	2.50653	5.24186	4.68032	3.92522	4.80036	5.51844	3.90041
2.569	3.19086	2.39165	3.76922	1.88155	3.48218	7.29251	2.92448	4.35654	6.43961	2.91807	6.40222	2.49441	6.34577	7.87325	4.93139	5.21573
1.89675	4.0274	1.8519	3.42471	1.32689	3.2357	8.72995	3.39243	3.94247	5.45093	2.9234	3.84875	2.60711	2.92999	3.01608	4.45473	10.6363
1.76435	3.15981	1.87461	3.84045	1.58491	3.22774	4.84117	3.29474	6.2941	4.19304	2.67724	6.25839	1.64783	3.85111	5.41257	4.97135	6.18359
1.58126	3.05293	2.02469	3.08568	1.57266	2.74046	2.00974	3.21104	6.15641	4.59275	7.43553	5.50443	2.81892	4.02659	6.75961	5.64678	3.07666
2.25429	2.60637	1.78631	3.74951	1.80642	3.03046	7.12943	2.87489	5.35833	4.62129	2.50818	3.88728	8.12209	4.04108	3.80725	5.34565	10.2958
2.01795	3.18748	2.16862	3.50352	2.45874	2.64503	7.75192	2.98477	5.26769	5.53658	2.36946	6.61996	3.16275	5.7512	5.69818	5.96541	9.94296
1.99737	2.85668	2.50021	3.2432	3.70133	3.19074	1.63112	2.9992	1.19123	6.51219	2.19252	5.65271	2.77275	4.99337	10.3107	4.15246	4.37217
2.00716	2.50581	2.93262	3.46532	2.14162	3.438	7.35218	2.90102	6.35796	4.57149	6.81773	5.0568	2.53776	5.05241	8.79495	4.3592	7.818
2.77163	3.40039	3.10369	3.74256	2.60865	3.06274	5.261	3.47352	1.80392	3.81812	6.51591	4.74916	2.51743	4.55242	2.62849	4.75633	10.0121
2.06572	3.16222	1.9998	3.656	2.52272	3.03615	4.30422	3.19217	5.43197	5.49203	1.60478	5.7732	1.58882	5.63797	1.67652	5.8793	5.43334
2.62279	3.14054	2.61703	3.08508	1.38931	3.38203	4.58185	2.84279	6.74004	4.90749	1.78723	4.92289	2.45413	5.24421	5.74046	4.99	2.50986
2.53933	3.59089	1.81608	2.78885	2.56463	3.10672	4.15703	3.34303	5.89007	4.40754	2.25638	3.66291	2.41413	4.51364	9.73714	3.51994	2.82806
2.53884	3.75576	1.59513	2.96607	3.21565	3.41452	2.86015	4.08415	4.67343	4.18165	1.84451	5.86788	2.31346	3.61605	1.39163	5.01339	5.75994
2.55685	2.50656	1.66494	2.80786	2.32758	3.25688	4.29229	3.94667	6.32139	5.66701	3.18191	4.8464	1.81613	4.66386	2.60554	3.99627	2.39457
2.81237	2.65014	2.35336	2.93444	3.44604	3.21109	1.37792	3.14226	4.40592	4.78288	2.70669	4.20293	1.78321	5.22771	2.19481	4.30745	5.93379
2.39517	2.9555	2.2226	3.37175	2.12751	4.4449	7.46442	3.60041	2.31455	5.69131	9.02466	4.02281	2.7591	5.22747	2.65693	4.22931	10.9139
2.25275	3.1732	1.83221	2.92735	2.90485	3.20677	5.8783	2.78038	4.05924	4.15529	6.29628	4.31307	7.597	4.03638	2.3986	6.31222	6.47514
2.53747	3.04304	2.21225	2.73395	2.44774	3.63269	2.40216	3.27628	3.82187	5.4869	2.99741	3.53455	1.90214	5.17345	1.96344	4.97772	8.40475
2.40282	4.09812	2.88384	2.75121	3.11186	3.49145	3.92323	2.75537	8.02817	4.1094	6.25496	4.89916	3.51643	4.60196	3.10453	5.64046	9.34526
2.66176	3.4438	2.05892	2.64933	1.90586	3.17849	3.92631	3.79486	1.25431	7.36733	2.49319	5.52133	4.23901	4.94167	1.38695	3.83889	5.79464
1.85491	3.10083	2.44319	2.73066	2.37072	2.6	7.09948	2.62526	6.19993	3.95536	2.06279	4.38624	3.16076	4.96429	1.92846	5.55476	5.94352
1.92324	3.47074	1.5501	3.91943	2.10642	3.07445	5.48689	4.56874	2.1661	4.50042	5.56067	4.08204	2.72642	4.58587	1.592	4.69071	10.7659
2.32485	2.58544	2.01968	2.78035	2.46733	2.84961	5.29617	3.91329	5.77636	6.05486	2.83087	2.29432	2.15409	4.08553	9.22517	4.61228	2.67777
2.25723	2.94919	3.05573	2.97693	1.74706	3.00707	2.73617	3.25948	8.87825	4.45821	1.96741	4.5278	3.0416	5.25688	6.9745	3.48085	6.89797
2.10667	4.06109	2.76626	3.18016	1.73943	3.2069	3.83872	3.20696	3.65756	5.25975	2.09374	3.8056	3.29729	4.36941	2.95068	4.20755	3.85662
2.38144	2.94058	3.24825	3.59455	1.53493	3.19387	1.75958	3.11001	4.94433	4.91844	3.86528	3.99816	2.02569	5.6467	2.60582	3.42299	10.4569
2.53681	3.56371	3.33576	3.09635	2.81797	2.7773	9.11003	3.74526	10.0622	5.67929	1.29075	2.29896	2.29554	4.45515	10.6475	5.19113	4.02197
2.20082	3.57616	2.36758	3.72874	2.28806	2.82525	5.42654	3.18437	5.86798	4.89144	2.33106	4.05819	1.22463	5.33214	9.95687	4.30917	7.91118
1.99811	2.75249	2.74828	3.49732	1.7465	3.4968	8.21883	3.51299	7.72932	5.4873	5.65343	3.24279	5.08756	4.03104	2.44756	4.60771	10.8772
2.06315	2.70531	2.94641	2.76777	2.39733	2.5471	5.39502	3.30641	1.33176	5.21842	2.85837	1.89891	2.28187	5.60856	9.37723	4.99366	9.97221
2.24599	3.10969	2.41533	3.53716	1.66122	4.41411	7.60872	4.12794	1.51359	3.48746	4.44424	3.87019	2.66518	4.87797	2.19956	5.72357	11.6063
2.44652	3.29119	1.66122	3.91532	2.96454	4.23824	4.31022	3.08308	4.20866	3.73723	1.23989	1.88598	9.34268	5.3239	3.58226	7.21482	2.94309
2.86933	3.63767	3.13703	3.18664	1.81571	3.85998	6.74348	2.65018	8.04726	4.46109	4.64635	3.01143	2.66216	3.39013	4.66595	4.58779	4.0985
2.0377	3.06121	2.06837	3.04218	1.75672	2.69708	7.74652	4.14366	5.7426	4.84977	4.80989	5.02451	2.71209	5.11416	10.9179	5.44714	4.84135
2.46535	3.13336	1.70297	3.93776	1.67109	3.38632	5.68523	2.8675	7.27513	4.86596	2.8404	5.05532	4.09669	5.02719	4.98707	6.01277	6.12469
2.39697	3.40267	4.81737	4.16447	1.45409	3.3136	4.59368	2.58987	3.14521	4.2507	1.15658	1.91176	2.31363	3.95451	2.32945	4.84465	9.638
2.42397	3.65876	2.89672	3.15266	3.29504	2.89116	1.80245	3.08429	6.28516	5.55236	4.31136	4.56216	6.69479	2.89411	2.11724	4.9549	7.53975
1.80248	3.52821	2.30718	3.08607	3.3043	3.16602	5.55651	3.47721	3.29956	5.43197	2.53069	1.51102	3.17848	4.79345	3.81159	5.33265	7.98605
2.3062	3.63491	1.57301	3.30539	1.8062	2.89073	1.46772	3.08315	3.57213	5.50115	3.58723	4.656	3.09477	4.49234	5.25911	5.09032	6.11008
2.41621	2.73589	1.99803	3.4887	1.53267	2.92613	6.32517	2.98917	10.8336	5.95847	3.98525	1.58549	1.84883	4.65261	1.94787	5.11297	9.86215
2.62831	4.27803	2.17846	2.5248	1.78013	2.48613	1.35217	3.19537	3.84449	5.78271	1.80278	9.69794	5.73382	4.57582	4.28487	5.16468	10.6111
1.81833	3.11423	2.71694	3.03005	2.17882	3.33784	3.97167	3.14011	6.7744	5.65951	2.15368	4.80741	2.6263	3.9028	4.00156	5.11191	5.64106
2.72562	3.56395	2.60758	2.72426	2.53827	2.38415	5.74076	3.62682	1.2618	6.71142	3.96591	1.89103	2.92215	6.14605	2.94454	4.5509	3.91897
1.84328	3.28431	1.90524	2.6259	2.20548	2.77882	2.25554	3.93467	6.24875	5.72859	2.647	1.96599	2.35601	5.4272	5.34912	6.02677	12.5016
1.91929	3.91941	2.10492	3.29382	1.42857	3.16061	6.36735	2.73745	1.07571	5.86375	1.9579	3.53925	3.11227	4.38548	1.64751	4.10541	6.5613
2.06122	2.96762	2.1962	3.06891	2.45759	3.00868	6.74199	2.948	5.20452	4.02862	5.42781	1.44629	4.38573	3.90167	7.32628	4.34272	6.80873
1.98287	2.74255	1.55923	3.01585	1.43145	2.7978	5.36799	2.53659	3.13297	5.25182	3.09342	3.97856	12.6209	3.42352	4.34431	4.35056	10.4342
1.7049	3.74581	2.51772	2.79925	1.84766	2.71953	3.66175	3.28888	7.28797	5.1094	3.3619	3.90573	11.5207	5.39199	2.61062	3.36982	8.65498
1.42164	5.84727	2.9747	3.44332	2.72592	2.18358	6.25999	3.54394	8.48571	3.8057	3.27934	4.14102	1.73879	4.51865	3.47661	4.73229	2.22539
2.24145	4.06991	2.31444	3.19546	2.5245	3.06639	6.47297	3.2966	3.73642	5.03221	2.31744	3.80411	5.38149	4.51515	4.77296	4.35426	6.7334
1.74758	3.54623	1.45564		2.71738	3.11786	4.55913	3.42897	6.84182	4.7442	2.25151	4.93307	4.14706	3.94784	3.35627	3.81375	3.25595
2.39924	2.515	2.12647		1.81466	3.22254	8.82034	3.71551	5.81702	3.86816	2.04947	4.41778	2.6216	4.1704	4.09601	3.91039	8.02265
2.57599	2.94044	2.30761		2.2797	3.48085	4.58741	2.82308	5.08837	6.07446	2.08003	3.9565	1.90987	4.72203	9.64832	5.56306	10.3497
1.71287	3.70664	2.93341		3.14265	2.90574	4.58933	2.74251	4.68988	3.99207	2.74525	1.84866	1.65683	3.67762	2.57669	4.64241	4.88772
1.94975	3.04753	1.69488		2.72709	3.27626	6.50898	3.80379	6.17803	4.82371	3.22329	4.30515	2.94985	5.52602	4.34063	4.08761	5.38722
1.82278	3.1858	2.20332		2.40315	2.27058	4.11944	3.17752	8.68663	4.27105	2.12858	4.84392	8.00031	4.35684	7.00643	4.5654	9.30322
1.90339	2.53231	2.51485		1.80412	2.31023	6.62599	4.61735	6.04101	5.3059	3.18447	4.07911	6.94179	3.90188	2.51177	5.02497	5.64537
2.19188	3.1905	1.62512		2.60023	2.54065	8.47351	2.6155	2.98252	4.09973		4.27757	5.19505	4.7455	6.16109	5.65949	2.50967
2.41223	2.92958	1.78936		2.45325	2.67793	4.17411	2.81659	4.9139	4.34616		4.18297	2.77779	4.76683		4.21736	10.0099
2.0727	3.32573	1.81766		1.83003	2.82827	3.29505	3.21317	8.45787	6.15141		1.79313	2.76086	6.40854			4.76603
2.09359	2.68045	1.45907		2.2198	2.27769	3.61575	3.22852	6.00421	6.3011		3.30631	7.51312	4.14791			8.9766
1.46683	4.17192	1.31297		1.8826		5.012	2.52996	7.6922	4.02751		1.19073	4.22277	5.26365			7.29166
1.99531	4.02687	1.48475		2.82136		5.96306	3.49494	7.00241	5.09838		4.5489	2.11047	5.17494			2.69254
2.14463	2.54503	2.43983		2.14652		5.26243	3.82303	2.16204	5.43054		2.14644	3.21857	4.94642			4.13096
2.79121	3.09322	1.94688		1.63914		6.07345	3.48516	5.1739	4.48659		4.47529	2.80997	4.59286			2.81896
2.2026	3.16512	3.21923		1.98383		3.68853	3.62257	6.6258	4.31738		5.15736	7.26027	4.50192			9.72449
2.15186	4.52229	1.70993		1.25994		5.73232	3.25867		5.09589		3.17233	3.87239	3.5468			5.93647
2.00275	2.42207	2.27854		1.90202		3.67193	2.90281		4.70929		3.74077	4.16371	5.84007			8.82852
2.30481	2.71525	1.78524		1.73223		6.09242	3.90286		4.69306		5.45442	2.45163	5.59999			5.28222
	4.16143	2.17011		2.08904		3.29117	3.52619		4.73036		5.60704	4.77497	3.341			8.17023
	2.68029	1.43297		2.27605		3.82863	3.141		4.85015		4.85971	2.38232	4.35213			11.9051
	3.09705	1.96811		2.64583		2.50382	2.50941		5.2404		3.70543	3.68291	4.60324			9.59548
	2.75848	2.18387		2.07294		5.06681	3.43424		3.95945		1.85706	2.77119	4.49791			2.49911
	4.28357	1.55232		2.76364		1.03731	3.29254		4.49127		3.4445	3.26583	5.20694			3.57274
	3.21323	1.93028		2.10364		8.28316	4.69448		4.958		1.79351	2.39399	4.00193			4.73721
	4.213	1.54626		2.09012		6.75886	3.42872		4.23195		1.84591	2.79741	3.80997			8.62354
	4.27022	1.76171		2.53568		2.87683	3.10968		4.47153		3.66762	2.09358	4.05611			9.74075
	4.17488	2.44855		1.52284		5.54534	3.17983		4.9815		5.95379	4.55512	3.86326			11.5448
	4.73636	2.73295		1.49496		1.78292	2.93052		6.26342		4.24849	2.40794	5.34095			7.53574
	3.46439	1.75247		1.80564		5.98156	3.15298		4.95205		2.41169	2.39434	5.63533			3.47755
	2.99287	1.86965		1.5052		3.42929	3.76104		4.09499		3.80266	4.14752	6.73974			9.6785
	3.05196	1.77593		2.45103		4.37603	4.56812		4.20852		4.0188	6.883	4.80988
	2.71103	2.25402		1.79953		4.97041	3.07848		5.25226		4.31275
	3.27277	1.84491		2.82585		5.11823	3.642		4.35394		4.95462
	2.51204	1.93495		1.84686		6.16646	2.66347		4.90958		5.59597
	3.31207	2.18062		1.85859		2.2537	2.66424		3.25393		1.96221
	2.96038	2.00414		2.0798		5.00451	3.31193		4.67273		3.80376
	2.94569	1.69736		2.10394		2.66228	3.48751		4.50162		4.90608
	2.95188	2.02469		3.19518		6.33055	3.16775		4.36534		4.51027
	3.86071	1.85807		3.15792		5.29196	4.43393		3.5305		4.41136
	4.57064	1.51615		1.52263		9.06536	2.67072		6.60628		3.73139
	2.69485	2.20843		1.98776			3.80468		4.69803		2.29798
	3.36774	1.747		2.1927			2.68312		4.0452		1.99622
	3.16857	1.22908		2.85139			3.48406		5.73943		3.76415
	3.73649	2.35185		2.56134			3.21255		5.47832		3.67957
	3.20774	2.41672		3.03153			3.20433		4.5597		1.91971
	3.96483	1.8839		2.32429			2.72884		5.1718		4.66195
	3.51155	1.53573		2.52219			3.16022		3.23301		4.08376
	3.18406	2.12748					2.62899		5.69213		2.02343
	3.33973	1.75545					2.83604		4.87846		4.39673
	3.58415	2.18222					2.89628		6.01037		3.77314
	3.48468	2.00579					3.51579		4.94422		1.92148
	2.64718	2.13743					3.65397		3.95469		4.52373
	3.32592	2.26174					2.64205		3.935		4.39649
	3.40543	1.36424					2.32586		6.06401		1.56058
	2.94517	2.39019					3.73352		5.24007		3.95168
	3.28523	2.24733					3.14766		5.07316		3.71865
	3.61244	2.61642					3.82416		4.02935		3.86129
	3.78836	2.57524					2.96503		3.69897		1.4434
	3.71979	2.81755					3.58313		4.01685		5.34829
	3.19832	1.82225					3.72905		4.11697		5.13975
	2.65959	1.69318							4.66419		5.6938
	2.50164	2.13243							5.97127		4.58157
	2.84636	2.08093							6.54786		3.74469
	2.85647	2.94261							3.75549		8.66621
	3.81458	2.82099							5.83019		2.18183
	3.44009	2.08168							3.86106		5.0665
	2.94088	2.0809							4.73879		4.40462
	3.9327	2.16709							5.10531		4.44291
	3.11624	1.9404							5.09702		4.7591
	3.5335	2.62125							6.08181		1.79818
	2.87177	1.83127							3.89766		3.82134
	2.73165	1.77052							4.50913		5.76675
	4.0154	2.458							4.38029		3.37474
	3.58603	3.19665							4.52977		4.22909
	2.63069	1.81115							5.01272		1.79259
	3.42473	1.67469							4.09788		2.18441
	3.75622	2.46305							6.6659		4.94697
	3.52182	2.5558							5.10996		4.39325
	3.3348	3.14101							5.19833		3.89301
	3.18588	3.24297							5.17706		3.45857
	2.90812	2.83953							3.72213		2.57373
	3.0512	4.06971							4.86176		4.15636
	3.65926	2.72831							4.36534		4.02163
	2.79644	1.82683							5.16536		4.97178
	2.652	2.59867							4.78617		5.06583
	3.08643	3.04628							4.94683		5.40441
	4.29136								6.02895		3.74889
	3.22782								5.74226		2.10386
	3.80155								4.77342		4.86067
	3.08441								4.58407		5.73947
	2.84258								3.89976		4.89419
	2.86867								3.85208		4.15851
	3.8208								5.37556		1.56645
	3.13648								4.38374		4.57406
	3.28839								3.98031		4.09873
	2.94944								3.57441		4.36849
	2.50235								4.67832		4.40436
	3.22591								5.83453		2.29207
	3.37191								4.80635		4.76387
	2.50345								4.86218		4.63385
	4.28338								4.90769		4.46397
	3.06776								4.09468		1.274
	3.67776								4.93101		4.75888
	2.61795								4.96391		4.58977
	3.3886								4.36103		3.92493
	4.25647								3.8109		4.05492
	3.38198								4.93803		1.99775
	2.65469								4.3332		1.77285
	3.13465								3.85683		4.6241
	3.64241								4.51387		4.62437
	2.86119								5.14247		5.22532
	3.30751								5.91667		3.6379
	2.54272								3.02942		1.65092
	3.44309								1.52981		2.42281
	3.55936								3.46836		2.20939
	3.08357								4.74454		1.88111
	2.56988								3.04981		4.71784
	2.94396								2.35375		4.03253
	3.74262								4.06628		4.43798
	2.90085								3.27216		1.76692
	3.38075								2.46458		4.47673
	3.40107								1.98782		4.46407
	2.73834								1.90535		4.70655
									2.69843		5.48559
									5.5262		0.683947
									3.64362		2.58327
									1.65365		2.33616
									4.66427		4.14425
									3.52367		2.28347
									4.647		3.56011
									4.35815		2.22604
									3.63167		3.69609
									1.86595		1.89604
									2.03714		1.81546
									2.73999		4.87764
									3.74341
									3.63021
									4.88173
									4.25414
									1.73364
									4.22988
									4.38845
									3.30949
									1.72323
									2.01682
									3.02071
									5.13468
									2.76931
									1.42173
									4.77524
									1.743
									3.31919
									4.33827
									5.10683
									4.08741
									4.01991
									3.80229
									3.99916
									4.47688
									1.86813
									5.05782
									4.30328
									1.84886
									5.12744
									4.14741
									3.59564
									2.81435
									3.55034
									5.36002
									2.04211
									2.14824
									3.65564
									1.85355
									4.21241
									4.01107
									2.22275
									3.27906
									5.87067
									4.4908
									5.15839
									5.26019
									1.9211
									3.6353
									3.1122
									2.17268
									4.36126
									4.86178
									4.27318
									1.6427
									1.90319
									3.61723
									4.83966
									4.82757
									3.97369
									7.22317
									3.41359
									4.34668
									5.77421
									3.61893
									2.00444
									4.68743
									4.29515
									5.18304
									5.12598
									5.11918
									3.73782
									4.47939
									1.8427
									3.90207
									4.32458
									3.3624
									1.8014
									4.49056
									4.88854
									4.19023
									3.26655
									1.81765
									3.6642
									3.87345
									4.38912
									1.60038
									3.17617
									4.3376
									3.89864
									2.13251
									2.72461
									3.64724
									3.37762
									1.55998
									3.45087
									4.30962
									3.44949
									2.29054
									1.79224
									3.0544
									3.53947
