# Supplementary material for: Coordination between nucleotide excision repair and specialized polymerase DnaE2 action enables DNA damage survival in non-replicating bacteria
Source: eLife. 2021 Apr 15;10:e67552. doi: 10.7554/eLife.67552 (PMC8102061; doi:10.7554/eLife.67552)
Supplement: Figure 5—source data 1. [file elife-67552-fig5-data1.xlsx]

## Sheet: C_wild type
Frame	Time	wild type_no recovery_control						wild type_no recovery_MMC						wild type_recovery_control						wild type_recovery_MMC
		20190416 (256 cells)		20190515 (257 cells)		Total (513)	% cell_div	20190416 (250 cells)		20190515 (271 cells)		Total (521)	% cell_div	20190410 (254 cells)		20190517 (261 cells)		Total (515)	% cell_div	20190410 (282 cells)		20190517 (253 cells)		Total	% cell_div
		Cells_divided/frame	Total cells divided	Cells_divided/frame	Total cells divided			Cells_divided/frame	Total cells divided	Cells_divided/frame	Total cells divided			Cells_divided/frame	Total cells divided	Cells_divided/frame	Total cells divided			Cells_divided/frame	Total cells divided	Cells_divided/frame	Total cells divided	535
1	0	0	0	0	0	0	0	0	0	0	0	0	0	0	0	0	0	0	0	0	0	0	0	0	0
2	5	0	0	0	0	0	0	0	0	0	0	0	0	0	0	0	0	0	0	0	0	0	0	0	0
3	10	0	0	0	0	0	0	0	0	0	0	0	0	0	0	0	0	0	0	0	0	0	0	0	0
4	15	0	0	0	0	0	0	0	0	0	0	0	0	0	0	0	0	0	0	0	0	0	0	0	0
5	20	0	0	0	0	0	0	0	0	0	0	0	0	0	0	1	0	0	0	0	0	0	0	0	0
6	25	0	0	0	0	0	0	0	0	0	0	0	0	0	0	0	1	1	0.194175	0	0	0	0	0	0
7	30	0	0	0	0	0	0	0	0	0	0	0	0	0	0	1	1	1	0.194175	0	0	0	0	0	0
8	35	0	0	0	0	0	0	0	0	0	0	0	0	1	0	1	2	2	0.38835	0	0	0	0	0	0
9	40	0	0	0	0	0	0	0	0	0	0	0	0	1	1	3	3	4	0.776699	0	0	0	0	0	0
10	45	0	0	0	0	0	0	0	0	0	0	0	0	1	2	4	6	8	1.5534	0	0	0	0	0	0
11	50	0	0	1	0	0	0	0	0	0	0	0	0	1	3	5	10	13	2.52427	0	0	0	0	0	0
12	55	0	0	0	1	1	0.194932	0	0	0	0	0	0	2	4	4	15	19	3.68932	0	0	0	0	0	0
13	60	0	0	0	1	1	0.194932	0	0	0	0	0	0	1	6	12	19	25	4.85437	0	0	0	0	0	0
14	65	2	0	0	1	1	0.194932	0	0	0	0	0	0	5	7	17	31	38	7.37864	0	0	0	0	0	0
15	70	0	2	2	1	3	0.584795	0	0	0	0	0	0	4	12	20	48	60	11.6505	0	0	0	0	0	0
16	75	0	2	8	3	5	0.974659	0	0	0	0	0	0	1	16	8	68	84	16.3107	0	0	1	1	1	0.186916
17	80	4	2	16	11	13	2.53411	0	0	0	0	0	0	4	17	7	76	93	18.0583	0	0	0	1	1	0.186916
18	85	5	6	30	27	33	6.43275	0	0	0	0	0	0	9	21	12	83	104	20.1942	2	2	1	2	4	0.747664
19	90	20	11	13	57	68	13.2554	0	0	0	0	0	0	8	30	10	95	125	24.2718	0	2	2	4	6	1.1215
20	95	24	31	24	70	101	19.6881	0	0	0	0	0	0	13	38	7	105	143	27.767	2	4	1	5	9	1.68224
21	100	41	55	35	94	149	29.0448	0	0	0	0	0	0	10	51	16	112	163	31.6505	2	6	2	7	13	2.42991
22	105	23	96	34	129	225	43.8596	0	0	0	0	0	0	13	61	10	128	189	36.699	1	7	4	11	18	3.36449
23	110	35	119	20	163	282	54.9708	0	0	0	0	0	0	10	74	13	138	212	41.165	0	7	1	12	19	3.5514
24	115	25	154	22	183	337	65.692	0	0	0	0	0	0	10	84	18	151	235	45.6311	3	10	0	12	22	4.11215
25	120	22	179	16	205	384	74.8538	0	0	0	0	0	0	9	94	7	169	263	51.068	0	10	1	13	23	4.29907
26	125	10	201	8	221	422	82.2612	0	0	0	0	0	0	9	103	8	176	279	54.1748	3	13	2	15	28	5.23364
27	130	16	211	8	229	440	85.77	1	1	0	0	1	0.191939	9	112	10	184	296	57.4757	1	14	5	20	34	6.35514
28	135	5	227	3	237	464	90.4483	0	1	0	0	1	0.191939	11	121	9	194	315	61.165	1	15	3	23	38	7.1028
29	140	7	232	2	240	472	92.0078	0	1	1	1	2	0.383877	15	132	9	203	335	65.0485	3	18	3	26	44	8.2243
30	145	2	239	0	242	481	93.7622	0	1	0	1	2	0.383877	11	147	3	212	359	69.7087	0	18	3	29	47	8.78505
31	150	2	241	3	242	483	94.152	0	1	0	1	2	0.383877	6	158	3	215	373	72.4272	3	21	1	30	51	9.53271
32	155	3	243	2	245	488	95.1267	0	1	2	3	4	0.767754	11	164	7	218	382	74.1748	3	24	1	31	55	10.2804
33	160	1	246	1	247	493	96.1014	0	1	0	3	4	0.767754	6	175	3	225	400	77.6699	6	30	1	32	62	11.5888
34	165	0	247	1	248	495	96.4912	0	1	1	4	5	0.959693	9	181	5	228	409	79.4175	3	33	3	35	68	12.7103
35	170	2	247	0	249	496	96.6862	0	1	0	4	5	0.959693	5	190	4	233	423	82.1359	8	41	1	36	77	14.3925
36	175	0	249	0	249	498	97.076	1	2	1	5	7	1.34357	11	195	2	237	432	83.8835	1	42	4	40	82	15.3271
37	180	1	249	0	249	498	97.076	0	2	1	6	8	1.53551	4	206	4	239	445	86.4078	5	47	2	42	89	16.6355
38	185	1	250	1	249	499	97.271	0	2	1	7	9	1.72745	8	210	2	243	453	87.9612	4	51	3	45	96	17.9439
39	190	0	251	1	250	501	97.6608	1	3	1	8	11	2.11132	4	218	1	245	463	89.9029	5	56	3	48	104	19.4393
40	195	1	251	1	251	502	97.8558	0	3	2	10	13	2.4952	5	222	1	246	468	90.8738	1	57	2	50	107	20
41	200	0	252	0	252	504	98.2456	0	3	1	11	14	2.68714	1	227	3	247	474	92.0388	3	60	2	52	112	20.9346
42	205	0	252	0	252	504	98.2456	1	4	1	12	16	3.07102	3	228	1	250	478	92.8155	5	65	3	55	120	22.4299
43	210	0	252	0	252	504	98.2456	0	4	0	12	16	3.07102	3	231	1	251	482	93.5922	2	67	2	57	124	23.1776
44	215	0	252	0	252	504	98.2456	0	4	1	13	17	3.26296	2	234	2	252	486	94.3689	3	70	0	57	127	23.7383
45	220	0	252	2	252	504	98.2456	2	6	1	14	20	3.83877	0	236	0	254	490	95.1456	6	76	5	62	138	25.7944
46	225	0	252	0	254	506	98.6355	0	6	2	16	22	4.22265	1	236	0	254	490	95.1456	3	79	2	64	143	26.729
47	230	0	252	0	254	506	98.6355	0	6	1	17	23	4.41459	0	237	0	254	491	95.3398	4	83	0	64	147	27.4766
48	235	1	252	0	254	506	98.6355	0	6	0	17	23	4.41459	0	237	0	254	491	95.3398	4	87	2	66	153	28.5981
49	240	0	253	0	254	507	98.8304	0	6	2	19	25	4.79846	2	237	1	254	491	95.3398	6	93	2	68	161	30.0935

## Sheet: C_dnaE2
Frame	Time	∆dnaE2_no recovery_control						∆dnaE2_no recovery_MMC						∆dnaE2_recovery_control						∆dnaE2_recovery_MMC
		20190417 (104 cells)		20190518 (264 cells)		Total	% cell_div	20190417 (183 cells)		20190518 (260 cells)		Total	% cell_div	20190412 (212 cells)		20190520 (256 cells)		Total	% cell_div	20190412 (204 cells)		20190520 (277 cells)		Total	% cell_div
		Cells_divided/frame	Total cells divided	Cells_divided/frame	Total cells divided	368		Cells_divided/frame	Total cells divided	Cells_divided/frame	Total cells divided	443		Cells_divided/frame	Total cells divided	Cells_divided/frame	Total cells divided	468		Cells_divided/frame	Total cells divided	Cells_divided/frame	Total cells divided	481
1	0	0	0	0	0	0	0	0	0	0	0	0	0	0	0	0	0	0	0	0	0	0	0	0	0
2	5	0	0	0	0	0	0	0	0	0	0	0	0	0	0	0	0	0	0	0	0	0	0	0	0
3	10	0	0	0	0	0	0	0	0	0	0	0	0	1	0	0	0	0	0	0	0	0	0	0	0
4	15	0	0	0	0	0	0	0	0	0	0	0	0	0	1	0	0	1	0.213675	0	0	0	0	0	0
5	20	0	0	0	0	0	0	0	0	0	0	0	0	1	1	2	0	1	0.213675	0	0	0	0	0	0
6	25	0	0	0	0	0	0	0	0	0	0	0	0	1	2	1	2	4	0.854701	0	0	0	0	0	0
7	30	0	0	0	0	0	0	0	0	0	0	0	0	2	3	0	3	6	1.28205	0	0	0	0	0	0
8	35	0	0	0	0	0	0	0	0	0	0	0	0	1	5	2	3	8	1.7094	0	0	0	0	0	0
9	40	0	0	0	0	0	0	0	0	0	0	0	0	1	6	3	5	11	2.35043	0	0	0	0	0	0
10	45	1	0	0	0	0	0	0	0	0	0	0	0	1	7	5	8	15	3.20513	0	0	0	0	0	0
11	50	0	1	0	0	1	0.271739	0	0	0	0	0	0	1	8	3	13	21	4.48718	0	0	0	0	0	0
12	55	0	1	0	0	1	0.271739	0	0	0	0	0	0	1	9	3	16	25	5.34188	0	0	0	0	0	0
13	60	0	1	0	0	1	0.271739	0	0	0	0	0	0	3	10	3	19	29	6.19658	0	0	0	0	0	0
14	65	1	1	1	0	1	0.271739	0	0	0	0	0	0	4	13	3	22	35	7.47863	0	0	0	0	0	0
15	70	10	2	0	1	3	0.815217	0	0	0	0	0	0	1	17	3	25	42	8.97436	0	0	0	0	0	0
16	75	6	12	0	1	13	3.53261	0	0	0	0	0	0	1	18	5	28	46	9.82906	0	0	0	0	0	0
17	80	15	18	2	1	19	5.16304	0	0	0	0	0	0	5	19	13	33	52	11.1111	0	0	0	0	0	0
18	85	10	33	4	3	36	9.78261	0	0	0	0	0	0	1	24	12	46	70	14.9573	0	0	0	0	0	0
19	90	19	43	12	7	50	13.587	0	0	0	0	0	0	5	25	13	58	83	17.735	0	0	0	0	0	0
20	95	10	62	22	19	81	22.0109	0	0	0	0	0	0	5	30	13	71	101	21.5812	0	0	1	1	1	0.2079
21	100	6	72	16	41	113	30.7065	0	0	0	0	0	0	10	35	15	84	119	25.4274	0	0	0	1	1	0.2079
22	105	9	78	30	57	135	36.6848	0	0	0	0	0	0	5	45	12	99	144	30.7692	0	0	2	3	3	0.623701
23	110	5	87	43	87	174	47.2826	0	0	0	0	0	0	4	50	7	111	161	34.4017	0	0	1	4	4	0.831601
24	115	2	92	25	130	222	60.3261	0	0	0	0	0	0	5	54	5	118	172	36.7521	0	0	0	4	4	0.831601
25	120	4	94	27	155	249	67.663	0	0	0	0	0	0	7	59	14	123	182	38.8889	0	0	0	4	4	0.831601
26	125	1	98	24	182	280	76.087	0	0	0	0	0	0	7	66	11	137	203	43.3761	0	0	2	6	6	1.2474
27	130	0	99	17	206	305	82.8804	0	0	0	0	0	0	7	73	10	148	221	47.2222	0	0	1	7	7	1.4553
28	135	2	99	8	223	322	87.5	0	0	1	1	1	0.225734	9	80	8	158	238	50.8547	0	0	0	7	7	1.4553
29	140	1	101	5	231	332	90.2174	0	0	0	1	1	0.225734	6	89	5	166	255	54.4872	1	1	1	8	9	1.8711
30	145	0	102	3	236	338	91.8478	1	1	0	1	2	0.451467	10	95	9	171	266	56.8376	0	1	1	9	10	2.079
31	150	0	102	2	239	341	92.663	1	2	0	1	3	0.677201	10	105	7	180	285	60.8974	1	2	1	10	12	2.4948
32	155	0	102	1	241	343	93.2065	0	2	0	1	3	0.677201	10	115	12	187	302	64.5299	0	2	0	10	12	2.4948
33	160	1	102	5	242	344	93.4783	0	2	1	2	4	0.902935	10	125	6	199	324	69.2308	0	2	1	11	13	2.7027
34	165	0	103	1	247	350	95.1087	0	2	0	2	4	0.902935	7	135	10	205	340	72.6496	2	4	0	11	15	3.1185
35	170	0	103	1	248	351	95.3804	0	2	0	2	4	0.902935	5	142	9	215	357	76.2821	0	4	0	11	15	3.1185
36	175	0	103	2	249	352	95.6522	0	2	0	2	4	0.902935	13	147	5	224	371	79.2735	1	5	1	12	17	3.5343
37	180	0	103	0	251	354	96.1957	1	3	1	3	6	1.3544	5	160	1	229	389	83.1197	1	6	1	13	19	3.9501
38	185	0	103	0	251	354	96.1957	0	3	1	4	7	1.58014	4	165	1	230	395	84.4017	1	7	0	13	20	4.158
39	190	1	103	0	251	354	96.1957	1	4	0	4	8	1.80587	3	169	3	231	400	85.4701	2	9	1	14	23	4.7817
40	195	0	104	0	251	355	96.4674	0	4	1	5	9	2.0316	2	172	0	234	406	86.7521	0	9	1	15	24	4.9896
41	200	0	104	0	251	355	96.4674	0	4	0	5	9	2.0316	2	174	2	234	408	87.1795	1	10	0	15	25	5.19751
42	205	0	104	1	251	355	96.4674	2	6	0	5	11	2.48307	6	176	3	236	412	88.0342	1	11	0	15	26	5.40541
43	210	0	104	0	252	356	96.7391	1	7	1	6	13	2.93454	3	182	1	239	421	89.9573	1	12	1	16	28	5.82121
44	215	0	104	0	252	356	96.7391	0	7	0	6	13	2.93454	3	185	0	240	425	90.812	0	12	1	17	29	6.02911
45	220	0	104	0	252	356	96.7391	0	7	1	7	14	3.16027	3	188	1	240	428	91.453	0	12	1	18	30	6.23701
46	225	0	104	1	252	356	96.7391	1	8	1	8	16	3.61174	1	191	1	241	432	92.3077	0	12	0	18	30	6.23701
47	230	0	104	0	253	357	97.0109	6	14	0	8	22	4.96614	2	192	0	242	434	92.735	0	12	1	19	31	6.44491
48	235	0	104	0	253	357	97.0109	1	15	0	8	23	5.19187	3	194	0	242	436	93.1624	1	13	2	21	34	7.06861
49	240	0	104	0	253	357	97.0109	2	17	0	8	25	5.64334	0	197	0	242	439	93.8034	0	13	0	21	34	7.06861

## Sheet: D
		no recovery		recovery
		colonies	fraction survival	colonies	fraction survival
wild type	control	7000000		9000000
	0.125 µg/ml MMC	6000000	0.857143	8000000	0.888889
	control	5000000		3000000
	0.125 µg/ml MMC	3000000	0.6	3000000	1
	control	7000000		7000000
	0.125 µg/ml MMC	5000000	0.714286	6000000	0.857143
	control	5000000		6000000
	0.25 µg/ml MMC	4000000	0.8	5000000	0.833333
	control	9000000		10000000
	0.25 µg/ml MMC	6000000	0.666667	7000000	0.7
	control	7000000		4000000
	0.25 µg/ml MMC	4000000	0.571429	3000000	0.75
	control	10000000		3000000
	0.5 µg/ml MMC	2000000	0.2	1400000	0.466667
	control	10000000		5000000
	0.5 µg/ml MMC	2000000	0.2	3000000	0.6
	control	8000000		4000000
	0.5 µg/ml MMC	2000000	0.25	2000000	0.5
	control	5000000		6000000
	0.75 µg/ml MMC	1000000	0.2	3000000	0.5
	control	9000000		10000000
	0.75 µg/ml MMC	1300000	0.144444	4000000	0.4
	control	7000000		4000000
	0.75 µg/ml MMC	1600000	0.228571	1800000	0.45
∆dnaE2	control	10000000		7000000
	0.125 µg/ml MMC	1200000	0.12	2000000	0.285714
	control	5000000		5000000
	0.125 µg/ml MMC	1700000	0.34	2600000	0.52
	control	8000000		6000000
	0.125 µg/ml MMC	1400000	0.175	1700000	0.283333
	control	10000000		5000000
	0.25 µg/ml MMC	1000000	0.1	1000000	0.2
	control	10000000		6000000
	0.25 µg/ml MMC	600000	0.06	600000	0.1
	control	17000000		9000000
	0.25 µg/ml MMC	600000	0.0352941	400000	0.0444444
	control	10000000		4000000
	0.5 µg/ml MMC	300000	0.03	110000	0.0275
	control	15000000		11000000
	0.5 µg/ml MMC	200000	0.0133333	300000	0.0272727
	control	5000000		4000000
	0.5 µg/ml MMC	180000	0.036	260000	0.065
	control	10000000		5000000
	0.75 µg/ml MMC	60000	0.006	90000	0.018
	control	10000000		6000000
	0.75 µg/ml MMC	60000	0.006	90000	0.015
	control	17000000		9000000
	0.75 µg/ml MMC	80000	0.00470588	170000	0.0188889
